# Supplementary material for: Meteorological factors driven glacial till changing and the associated periglacial debris flows in Tianmo Valley, southeast Tibetan Plateau
Source: Copernicus journal article supplement (doi:10.5194/nhess-2016-251), 2016-07-29
Supplement: Supplementary file [file nhess-2016-251-AC1-supplement.pdf]

1 Meteorological factors ~~driven driving~~ glacial till ~~changing variation~~ and  
2 the associated periglacial debris flows in Tianmo Valley,

3 southeast Tibetan Plateau

4 M. F. Deng<sup>1,2</sup>, N. S. Chen<sup>1\*</sup>, and M. Liu<sup>1,2</sup>

5 (<sup>1</sup> Key Laboratory of Mountain Hazards and Surface Process, Institute of Mountain Hazards and Environment,  
6 Chinese Academy of Sciences, Chengdu 610041, China;

7 <sup>2</sup> University of Chinese Academic of Sciences, Beijing 100049, China)

8 Abstract: Meteorological studies have indicated that high Alpines are strongly affected by climate  
9 warming. Periglacial debris flows are more frequent in deglaciated regions. The combination of  
10 rainfall and air temperature controls the initiation of periglacial debris flows; and the addition of  
11 melt-water due to higher air temperatures enhances the complexity of the triggering mechanism  
12 compared to storm-induced debris flows. In south-eastern Tibetan Plateau where temperate  
13 glaciers are widely distributed, numerous periglacial debris flows have occurred in the past 100  
14 years, but none had happened in the Tianmo watershed until 2007. In 2007 and 2010, three  
15 large-scale debris flows occurred in the Tianmo watershed. In this research, these three debris flow  
16 events were chosen to analyze the impact of the annual meteorological conditions: the antecedent  
17 air temperature and meteorological triggers. TM images and field measurement of the nearby  
18 glacier suggested that a sharp glacier retreat had existed in the previous one or two years  
19 preceding the events, which coincided with the spiked mean annual air temperature. Besides,  
20 changing of glacial tills driven by prolonged increase in the air temperature is the prerequisite of  
21 periglacial debris flows. Triggers of periglacial debris flows are multiplied and they could be high  
22 intensity rainfall as in DF1 and DF3, or continuous percolation of melt-water due to the long term  
23 rising air temperatures as in DF2.

24 **1. Introduction**

25 The alpine environments are strongly vulnerable to climate changes, of which the  
26 alpine glaciers and permafrost are the most sensitive in the form of glacier and  
27 permafrost ~~retreat degradation~~ (Harris et al, 2009; IPCC, 2013). Glacier and  
28 permafrost retreat can induce mass movement, such as landslides, shallow slides,  
29 debris, moraine collapses, etc. (Cruden and Hu, 1993; Korup, 2009; McColl, 2012;  
30 Stoffel and Huggel, 2012; Fischer et al, 2012), that will be expelled out of the  
31 watershed in the form of debris flows or sediment flux. The debris flow in alpine

批注 [A1]: comment to review #1: Title: I suggest "mophological factors driving glacial till variations and.."  
English will be polished by a native speaker after we finish the change according to the comment of the two reviewer.

批注 [admin2]: comment to review #1: permafrost degradation instead of retreat

32 areas can often bury residential areas, cut off main roads and block rivers (Shang et al,  
33 2003; Cheng et al, 2005; Deng et al, 2013) and destroy basic facilities located in  
34 downstream, posing a great threat to the local economy and social development. In  
35 undeveloped alpine areas such as the south-eastern Tibet where the  
36 ~~transportation~~ ~~traffic/drainage~~ system is particularly poor or limited, the negative  
37 effects produced by debris flows such as cutting off main roads are serious (Cheng et  
38 al, 2005).

批注 [A3]: comment to review #1: not  
clear the expression "traffic/drainage"

39 Periglacial debris flows ~~occurs in~~ ~~characterize~~ the high alpine areas ~~where there~~  
40 ~~is containing~~ large areas of glaciers, such as the Tibetan Plateau in China (Shang et al,  
41 2003; Ge et al, 2014), Alps in Europe (Sattler et al, 2011; Stoffel and Huggel, 2012),  
42 Caucasus Mountains in Russia (Evans et al, 2009) and northern Canada (Lewkowicz  
43 and Harris, 2005). Periglacial debris flows were reported to be initiated by rainfall  
44 (Stoffel et al, 2011; Schneuwly-Bollscheiler and Stoffel, 2012), melt-water flow of  
45 glacier or ice particle ablation (Arenson and Springman, 2005; Decaulne et al, 2005),  
46 or outburst floods from glacier lakes (Chiarle et al, 2007) in different parts of the  
47 world, while the multi-triggers for the case is rarely to be read. Because debris flows  
48 are commonly triggered by rainfall (Sassa and Wang, 2005; Decaulne et al, 2007;  
49 Kean et al, 2013; Takahashi, 2014), the rainfall threshold, intensity and duration has  
50 been widely used for debris flow monitoring and giving warning in non-glacier areas  
51 (Guzzetti et al, 2008).

批注 [A4]: comment to review #1: not  
only also in the Andes and elsewhere !  
please organize this phrase to be more  
comprehensive

52 In deglaciation areas, the debris flow threshold can be more difficult to determine.  
53 Periglacial debris flows tend to occur in the summer when the thawing of glaciers and  
54 glacial tills predominates and melt-water penetrates into the glacial tills at a constant  
55 and successive flow. The effect of melt-water appears similar to that of antecedent  
56 rainfall (Rahardjo et al, 2008) and is variable in different periods, considering snow  
57 and glacier shrinkage and air temperature fluctuation. In the Swiss Alps, melt-water is  
58 high in early summer, and as debris flows can be initiated by low total rainstorm,  
59 whereas higher total rainstorm are required in late summer or early autumn when the  
60 melt-water is low (Stoffel et al, 2011; Schneuwly-Bollscheiler and Stoffel, 2012). In  
61 south-eastern Tibetan Plateau, the rainfall threshold given by Chen et al., (2011) is

62 quite wide, and the small rainfall threshold in particular is likely to contain the effect  
63 of air temperature. Moreover, periglacial debris flows induced by a sudden release of  
64 water from ~~dammed~~-glacier ~~lakes~~ have a close relationship with the rising air  
65 temperature (Liu et al, 2014).

批注 [A5]: comment to review #1: "lake"  
after glacier is probably missing

66 Fluctuation of air temperature is likely to be quite important in triggering  
67 periglacial debris flows. Compared with the storm induced debris flows, the addition  
68 of air temperature can greatly enhance the complexity of the initiation of periglacial  
69 debris flows. It is of high difficulty to simulate the triggering process by experiment  
70 or mathematical simulation, and instead, debris flows cases in the natural environment  
71 could be ~~applied the perfect object~~. In this research, three debris flow events, after a  
72 debris-flow-free period of nearly 100-year, in the Tianmo watershed of the  
73 southeastern of the Tibetan Plateau as deglaciation continued are used as examples,  
74 and the annual meteorological conditions, antecedent air temperature and triggering  
75 conditions prior to debris flows are analyzed to further understand the meteorological  
76 triggers and their roles in glacier retreat, glacial till ~~changevariation~~ and debris flow  
77 initiation.

批注 [A6]: comment to review #1: not  
clear what is the meaning of "the perfect  
object"

## 78 2. Background

### 79 (1) Study area

80 The temperate glacier in the Tibetan Plateau is primarily distributed in the  
81 Parlung Zangbo Basin and covered a total landmass of 2381.47 km<sup>2</sup> in 2010 based on  
82 TM images (Liu, 2013). Historically, the movement of temperate glacier has produced  
83 a large amount of moraines, the depth of which can reach up to 500 m locally (Yuan et  
84 al, 2007). In recent decades, there has been a dynamic significant increase in  
85 temperature and according to statistics the temperature at the Bomi meteorological  
86 station (midstream in the Parlung Zangbo Basin) has rose by 0.23°C/10a from 1969 to  
87 2007, resulting in remarkable shrinkage of the glacier(Yang et al, 2010).

88 Tianmo Valley, located in Bomi County and to the south of the Parlung Zangbo  
89 River, covers an area of 17.76 km<sup>2</sup> (29°59'N/95°19'E; Figure 1). This valley has a

90 northeast-southeast orientation and is surrounded by high mountains reaching 5590 m  
91 a.s.l. at the southernmost site and 2460 m a.s.l. at the junction of the Parlung Zangbo  
92 River. The TM image in 2013 showed the presence of a hanging glacier with an area  
93 of 1.42 km<sup>2</sup> in the upper concave area at an altitude of 4246 m to 4934 m. Bared rock,  
94 dipping at an angle of around 60°, emerged below and above the hanging glacier and  
95 often covered by everlasting snow. Below 3800m a.s.l., vegetation, including forest  
96 and shrub, occupies most of the area (Table 1).

97 The river channel in the watershed is sheltered by shade and not directly affected  
98 by sunlight, resulting in less solar radiation and a location at which a small trough  
99 glacier can form. In the main channel, the trough glacier extended to 2966 m a.s.l. in  
100 2006. The lower part of the trough glacier has been eroded by glacier melt-water flow,  
101 and an arch glacier that is vulnerable to high pressure was formed (Figure 2). The  
102 remnants of the landslide deposits approximately 10 meters high, which consist of low  
103 stability sediment and can be easily entrained by debris flows, can be observed in both  
104 sides of the channel.

105 Tianmo Valley is on the north side of the bend in the Yarlung Zangbo River and  
106 is strongly affected by the new tectonic movement. An inferred normal fault vertical  
107 to the channel cuts through the valley and is only 30 km away from the Yarlung  
108 Zangbo fault. In 1950, a rather significant earthquake (Ms. 8.6) hit Zayu, which is  
109 only 200 km away, and local records reported that a large amount of rock collapsed  
110 and landslides were produced at that time. The whole valley is in a strong ductile  
111 deformation zone and is dominated by gneissic lithology belonging to Presinian  
112 System.

## 113 (2) Disaster history

114 According to our field interview with local residents, there were no debris flows  
115 in approximately 100 years prior to 2007 in Tianmo Valley. The channel was quite  
116 narrow before 2007, and the local people could walk across via a wooden bridge to  
117 live and farm on the terrace on the west side. ~~The ecology was in a rather peaceful~~  
118 ~~state at that time.~~

批注 [A7]: The river channel in the watershed is sheltered by shade and not directly affected by sunlight, resulting in less solar radiation and a location at which a small trough glacier can form.

批注 [A8]: comment to review #1: please remove, very poetic but non scientific sentence

119 On the morning of Sep. 4<sup>th</sup>, 2007, after the rainfall which did not hit the  
120 downstream area ceased, the local forest guard heard a loud noise coming from the  
121 upstream area at approximately 18:00; with rainfall which later began in the upstream  
122 area at approximately 19:00, following this rainfall was debris flows which rushed out  
123 of the Tianmo Channel and subsequently blocked the Parlung Zangbo River; report  
124 stated that several debris flows occurred, lasting the entire night. According to the  
125 field measurements, approximately 1,340,000 m<sup>3</sup> of sediment was transported during  
126 this event, resulting in 8 missing persons and deaths. Concurrently within this same  
127 time, debris flows occurred in the four nearby valleys (Table 2). According to the size  
128 classification proposed by Jakob (2005), which is based on the total volume, peak  
129 discharge and inundated area, Size class of debris flows in the five valleys is given in  
130 Table 2.

131 At 11:30 on Jul. 25<sup>th</sup>, 2010, debris flows were again triggered in Tianmo Valley  
132 that traced the path of the preceding debris flow deposits and reached the other side of  
133 the Parlung Zangbo River. According to Ge et al., (2014), solid mass sediment of  
134 approximately 500,000 m<sup>3</sup> was carried out (Table 1) and deposited on the cone to  
135 block the main river. A barrier lake was formed, and the rising water destroyed the  
136 roadbed of G318. The following week also experienced dozens of debris flows in  
137 small magnitude.

138 Debris flows occurred again two months later on Sep. 6<sup>th</sup> (The Ministry of Land  
139 and Resources P. R. C., 2010), although we could not determine the exact times  
140 sequence of event but according to speculation, these debris flows could have  
141 occurred in the early morning before dawn and when the rainfall intensity has reached  
142 its maximum (Figure 9), which agrees with the findings of Chen (1991) that periglacial  
143 debris flows have historically occurred between 18:00~24:00 in this area. The debris  
144 barrier in the main river was consequently increased by an additional 450,000 m<sup>3</sup>, and  
145 the barrier lake was enlarged to maintain 9,000,000 m<sup>3</sup> of water.

146 A field investigation revealed that a high percentage of boulders in the  
147 downstream area and glacial tills above the trough glacier were quite loose and of  
148 high porosity (Figure 2), hence they have low density and can be easily entrained. Our

149 particle size tests on the glacial tills and debris flow deposits indicate a lower clay  
150 ( $d < 0.005$  mm) content, whereas the debris flow deposits contain more fine particles  
151 that are smaller than 10 mm (Figure 4), suggesting that the entrainment supplied a  
152 considerable amount of fine particles.

### 153 (3) Meteorological data

154 The study area is located in a high alpine area where the economy is quite  
155 undeveloped with only few meteorological stations. Before 2011, the Bomi  
156 meteorological station (since 1955) was the only station in the area, located 54 km  
157 away from Tianmo valley at an altitude of 2730 m, and other stations were located  
158 more than 200 km away.

159 The Tibetan Plateau is a massive terrace that obstructs the Indian monsoon,  
160 causing it to travel through the Yarlung Zangbo Canyon and its tributaries. As the  
161 Indian monsoon is transported to higher altitudes, a rainfall gradient emerges in the  
162 Parlung Zangbo Basin. However, according to our statistics on rainfall data in the area,  
163 the rainfall often enjoys the similar intensity for the long-term rainfall process from  
164 Guxiang to Songzong which means the there is no large rainfall gradient between  
165 Tianmo valley and Bomi meteorological station is more or less the same from Guxiang  
166 to Songzong considering the long term rainfall process; therefore, the rainfall data  
167 from the Bomi meteorological station can be used for our study. In order to conduct  
168 further study, another meteorological station was built in 2011 near Tianmo Valley.

169 It has been established that the air temperature decreases with altitude; therefore  
170 the air temperature in the source area of Tianmo Valley is lower than that in Bomi  
171 County. According to the research by Li and Xie (2006), the air temperature decreases  
172 at a rate of  $(0.46 \sim 0.69)^\circ\text{C}/100\text{m}$  over the whole Tibetan Plateau, and the rate in the  
173 study area is  $0.54^\circ\text{C}/100$  m. Because the glacier and permafrost in the source area  
174 have a planar distribution, the air temperature at the geometric centre of the glacier  
175 and permafrost can be used to analyze the temperature process.

批注 [admin9]: comment to review #1:  
Since when has the station been operated ?

批注 [A10]: comment to review #1: not  
convincing. please explain better

176 **3. Analysis and results**

177 **(1) Changing of air temperature and rainfall**

178 The mean annual air temperature is usually used to reflect the tendency of glacier  
179 change (Yang et al, 2015). We collected the mean annual air temperature and annual  
180 rainfall data from 1970 to 2014 from the Bomi meteorological station (Figure 5). The  
181 record showed that ~~the overall mean~~ air temperature has increased by approximately  
182 1.5°C in the last 45 years, accounting for 0.033°C/a. This air temperature increase was  
183 particularly more rapid between 2005~2007, an approximately 0.7°C/3a, which is 7  
184 times the average value of the last 45 years. On the other hand, the annual rainfall  
185 from 2000 to 2010 was low and it was estimated at 828.2 mm per year. From 2000 to  
186 2004, the rainfall during summer (July to September) accounted for approximately 50%  
187 of the total annual rainfall; however, only 32% of the rainfall occurred in the summer  
188 of 2005~2006, even though the annual rainfall exhibited the same trend. In 2007, ~~the~~  
189 rainfall in the summer and the entire year returned to the mean rainfall state, normal.

190 According to Figure 5, a similar trend in the air temperature and rainfall was  
191 observed before DF2 and DF3. The air temperature elevated in 2009 to reach the  
192 maximum of the last 45 year period, accounting for 10.2 °C; however, the annual  
193 rainfall, was only 65% of the average amount; and the summer rainfall, lower than  
194 that in 2005 and 2006, reached their minimum values. In 2010, the rainfall was  
195 abundant and the annual rainfall increased to 1080.6 mm, which is approximately 30%  
196 more than the average value and close to the maximum.

197 The following common traits can be identified from comparing the annual  
198 meteorological conditions of DF1, DF2 and DF3. 1) One or two years before the  
199 debris flows, the mean annual temperature elevated and the annual rainfall and  
200 summer rainfall ~~declined~~ increased. The climate was in a "hot-dry" state. 2) As the  
201 temperature gradually decreased, the annual rainfall returned to normal or increased,  
202 and the "hot-wet" climate contributed to debris flow initiation (Lu and Li, 1989).

批注 [A11]: comment to review #1: mean instead of overall

批注 [A12]: comment to review #1: in all this paragraph one wonders the role of snow vs rainfall in the measurements. Is snowfall measured? How is it relevant? -It's a pity that we cannot collect the data on snow so the impact of snow cannot be analyzed.

批注 [admin13]: comment to review #1: what is normal?

批注 [A14]: comment to review #1: I don't understand why you say the rainfall increased at line 195 whereas before you said it was reduced. In this paper, the year before the three debris flows is hot comparing with the year before.

## 203 (2) Changing of glacier in Tianmo valley

204 In our research, remote image is collected to analyze the changing of glacier in  
205 the source area during the past years. In order to eliminate the effect of snow cover,  
206 images were taken in the thawing seasons when the snow cover is limited to enable an  
207 easy detection of the glacier from snow. Besides, a bright cloud is still needed to show  
208 the watershed clearly; however a difficult case ensues when the rainy season comes  
209 in-between the thawing season when the atmosphere is often covered by thick cloud.  
210 Further, in order to show glacier retreat and its impact on debris flows properly, the  
211 images should be within similar time interval, like 3 years, before and after debris  
212 flow events. As the high resolution images are rare to obtain and we could only collect  
213 one SPOT image (with a space resolution of 5m) in 2008. To achieve consistency of  
214 the images, we collected 5 TM images image (with a space resolution of 30m), taken  
215 on Sep. 17<sup>th</sup>, 2000, Jul. 24<sup>th</sup>, 2003, Sep. 21<sup>st</sup>, 2006, Sep. 24<sup>th</sup>, 2009 and Aug. 4<sup>th</sup>, 2013,  
216 respectively.

217 Based on the 5 TM images, we classified the area as glacier, snow, bared land,  
218 gully deposition and vegetation in time series (Figure 6), and the area of each is given  
219 in Table 1. Figure 6 showed that deglaciation was taking place in Tianmo valley and  
220 in particular, the eastern branch had experienced the sharpest deglaciation. In order to  
221 show clearly the rapid rate of glacier retreat, a graph was plotted to show the changing  
222 of glacier and the eastern branch in Figure 7.

223 Figure 7 shows that glacier in Tianmo valley had been in shrinkage since 2000 to  
224 2013, with variation in glacier retreat rate. In 2000~2003, 2003~2006, 2006~2009 and  
225 2009~2013, the glacier retreat rate in Tianmo valley corresponds to 0.02, 0.06, 0.027  
226 and 0.0075km<sup>2</sup>/a and 0.0033, 0.01, 0.008 and 0.002 km<sup>2</sup>/a for the eastern branch.  
227 According to these figures the largest glacier retreat rate was in 2003~2006, followed  
228 by that in 2006~2009. It is important that glacier area at the beginning should be taken  
229 into consideration to judge the changing rate of glacier. The glacier retreat rate is  
230 normalized and the relative glacier retreat rate is defined as: can be calculated based on  
231 theis area changing.

批注 [A15]: comment to review #1:  
please describe what is SPOT and TM

批注 [A16]: comment to review #1:  
values better expressed in hectares. In this  
manuscript we did not use hectares  
considering that it may not useful for the  
changing of the eastern branch of glacier;  
inseted, the relative glacier retreat rate is  
applied to show the changing rate

带格式的: 非突出显示



带格式的：两端对齐，缩进：首行缩进：2 字符

批注 [A17]: comment to reviewer 1#: equation is not needed, it is just a simple relative variation ratio

批注 [A18]: comment to reviewer 1#: not clear, why the increase may have ontributed to glacier retreat ? Please check or rephrase -As there is no data on snow, it is just a speculation.

232 
$$D = \frac{(A_0 - A_1)}{nA_0} \quad (1)$$

233 Where  $D$  is the relative glacier retreat rate,  $\text{km}^2/\text{a}/\text{km}^2$ ;  $A_0$  is glacier area at the beginning,  
234  $\text{km}^2$ ;  $A_1$  is glacier area at the end,  $\text{km}^2$ ;  $n$  is the duration of year, a.

235 The relative glacier retreat rate are 11.30, 35.09, 17.43 and  $5.17 \cdot 10^{-3} \text{km}^2/\text{a}/\text{km}^2$   
236 during 2000~2003, 2003~2006, 2006~2009 and 2009~2013, respectively; whereas, it  
237 is 20.83, 66.67, 66.67 and  $20.83 \cdot 10^{-3} \text{km}^2/\text{a}/\text{km}^2$  for the eastern branch. These figures  
238 show that the relative glacier retreat rate for the eastern branch had shrunk much more  
239 sharply between 2000 ~2013.

240 In this research, TM images with 3 year intervals were applied can only get the  
241 mean glacier retreat rate. As glacier retreat rate in the 3 three years could be either  
242 high or low, field measurement of the nearby glacier is used to show the glacier retreat  
243 condition before debris flows. Yang et al.(2015) had conducted field measurement of  
244 No.94 Glacier in Parlung Zangbo Basin since 2006 and the field measurement  
245 suggests it was in negative balance in 2006~2010(Figure 7). The negative balance  
246 reached the maximal in 2009, followed by 2008 and 2006, indicating sharp  
247 deglaciation in these three years.

248 When we combined the result of TM image and filed measurement of No. 94  
249 Glacier, we observed that it is right before debris flows that glacier in Tianmo valley  
250 experienced the sharpest deglaciation in 2006, 2008 and 2009, which was also  
251 coincidental with the elevated mean annual air temperature (Figure 5). Besides, the  
252 maximum glacier retreat in 2009 could be also related to the decline of snowfall in the  
253 preceding winter and early spring. ~~and its increase may also have aided the glacier~~  
254 ~~retreat in 2007 and 2010.~~

### 255 (3) Antecedent air temperature and rainfall process

256 The air temperature in the source area can be obtained using the vertical decline  
257 rate ( $0.54^\circ\text{C}/100 \text{ m}$ ). According to this method, the air temperature in the source area  
258 was  $9.8^\circ\text{C}$  lower than that at the Bomi meteorological station. We collected the daily

259 temperature; that is the lowest temperature, the mean temperature and daily rainfall  
260 from June to September in 2007 and 2010 (Figure 8).

261 According to Figure 8, the lowest air temperature was below 0 at the end of June,  
262 2007. At the beginning of July, the air temperature started to rise quickly which  
263 continued until early September when DF1 occurred, this demonstrates that the high  
264 air temperature in July and August contributed to DF1.

265 According to Figure 8, the air temperature was high from early July to late  
266 August, and another high air temperature period emerged in early September. When  
267 DF2 occurred in late July the air temperature had reached the maximum for that year,  
268 which suggests that the air temperature in early and middle July was responsible for  
269 DF2. After DF2 occurred, the air temperature in August began to prepare for DF3.

270 Antecedent air temperature fluctuation includes the air temperature and its  
271 duration. The air temperature and duration before debris flows are variable, making  
272 them difficult to evaluate. The accumulation of positive air temperature is usually  
273 applied to analyze the impact of air temperature on glacier melting (Rango and  
274 Martinec, 1995), which can be expressed as:

$$T_{PT} = \sum_{i=-n}^0 T_i (T_i > 0) \quad (21)$$

276 Where  $T_{PT}$  is the positive air temperature accumulation, °C and  $T_i$  is the  
277 average daily air temperature; only  $T_i > 0$  is included.

278 Because air temperature is successive, it is difficult to determine the beginning of  
279 positive air temperature accumulation. Glacial tills can lessen the heat that penetrates  
280 into them, and the low air temperature can only contribute to the upper thin layer;  
281 moreover, freeze-thaw cycles exist when the lowest air temperature is less than 0°C.  
282 From this point of view, the beginning of positive air temperature accumulation is  
283 defined as the time at which the lowest air temperature exceeds 0°C for **two or three**  
284 **several** successive days or the last debris flow.

285 Based on the above method, we can deduce that the positive air temperature  
286 accumulation began when the lowest air temperature exceeded 0°C for several

批注 [A19]: comment to review #1:  
how many are several ? not precise !

287 successive days, starting on June 28<sup>th</sup>, 2007 and June 9<sup>th</sup>, 2010 corresponding to DF1  
288 and DF2, respectively, and on July 26<sup>th</sup>, 2010 for DF3, following DF2. The duration  
289 and  $T_{PT}$  were calculated for each debris flow event, the result was 69 days and  
290 517.9°C, 47 days and 332.1°C, 42 days and 320.4°C (Figure 8) for DF1, DF2, and  
291 DF3, respectively. The result showed that  $T_{PT}$  for DF1 is much larger than the other  
292 two, and ~~the reasons for this may lie in the watershed there had been which is~~  
293 ~~coincidence to the fact that there was~~ no debris flows in the past dozens of years and  
294 ~~only~~ extraordinary external forces ~~such as larger~~  $T_{PT}$  ~~is required to could have~~  
295 destroyed the long-term balance.

#### 296 (4) Triggering conditions

297 The continuous nature of the air temperature limits the possibility for debris  
298 flows triggered by a sole abrupt increase in air temperature; and since the previous air  
299 temperature trend cannot be neglected, it is of no sense to study air temperature  
300 triggers.

301 Antecedent rainfall is a factor that favours debris flows. In our analysis, the  
302 rainfall over the three days preceding a debris flow event is given in Figure 9.

303 Before DF1, the air temperature was high, and continued through July and  
304 August. The  $T_{PT}$  reached 517.9°C. According to the local forest guard, an isolated  
305 convective storm occurred prior to DF1 though no rainfall was recorded at the Bomi  
306 meteorological station or in the downstream area at that time. In Figure 9, as the  
307 rainfall right before DF1 occurred was not recorded by Bomi meteorological station, we  
308 added to the rainfall intensity ~~(like 5 mm/h)~~ (about 5 mm/h according to the description of the  
309 forest guard) before DF1 to account for the storm, which does not  
310 reflect the rainfall during storm conditions. We can therefore conclude that this  
311 isolated convective storm initiated DF1, while the long-term high air temperature  
312 trend had paved the road for DF1. Considering a large deglaciaded area, several other  
313 periglacial debris flows simultaneously also occurred near Tianmo Valley (Deng et al,

域代码已更改

批注 [A20]: comment to review #1: but DF1 was a much larger event compared to the others. Not sure about this interpretation.

批注 [admin21]: comment to review #1: why 5 mm/hr ? not clear

314 2013), which suggests the advantageous meteorological conditions for debris flow  
315 initiation.

316 DF2 took place when the air temperature reached the peak in 2010. The thaw  
317 season began in the middle of June, and the  $T_{PT}$  reached 332.1°C. On July 24<sup>th</sup>, one  
318 day before DF2, the air temperature reached the maximum value for that year. The  
319 rainfall record at the Bomi meteorological station shows that there had been no  
320 rainfall several days preceding DF2, and the local citizens also did not observe any  
321 rain either. The trigger of DF2 was likely the continuous percolation of melt-water  
322 due to the long term rising air temperature.

323 According to field interviews, several debris flows of small magnitude had also  
324 occurred before DF3. The air temperature decreased in late August but increased to  
325 another high peak before DF3, and the  $T_{PT}$  reached 320.4°C. Rainfall began 2 days  
326 prior to DF3 and was steady the entire day before DF3. According to the rainfall trend  
327 at the Bomi meteorological station, the rapid increase in rainfall intensity started 4  
328 hours before DF3 and reached 3.8 mm/h, which was responsible for the initiation of  
329 DF3.

#### 330 4. Discussion

331 Debris flows initiation is the process when water source provokes the movement  
332 of soil ~~mass~~sediment. In this research, we found that the three debris flows were  
333 triggered by high air temperature and rainfall in DF1, high air temperature in DF2,  
334 and rainfall in DF3 respectively. When we analyzed the date and the triggers for these  
335 events, various questions came to mind that gave reasons to doubts: 1) Why debris  
336 flows did not occur in 2006 or 2009 when deglaciation reached its peak and more ice  
337 melt water was present; 2) Why DF1 and DF3 occurred in September when the air  
338 temperature and the ice melt water was decreasing; 3) Why was there is no large scale  
339 debris flows triggered by the previous heavier storm. It makes us believe that the  
340 impact of water source on the magnitude and frequency of debris flows is quite low,  
341 or there could be much more debris flows; and instead, soil source, including its

批注 [A22]: comment to review #1:  
sediment instead of soil mass

342 magnitude and activity, should be the predominate controller, just as Jakob et al.,  
343 (2005) pointed out that the recharge of channel should be the prerequisite for debris  
344 flows. However, in most situations we cannot reach the source area to detect the soil  
345 source and the high-tech remote sensing can just distinguish the boundary scope of soil  
346 source. In the periglacial periglacial area where the glacial till is often covered by  
347 glacier or everlasting snow, changing of soil source seems to be of high difficulty to  
348 detect. In this research, we try to combine the meteorological condition and the  
349 literatures to discuss the probable change variation of glacial tills before debris flows.

### 350 (1) Changing-Variation of glacial till in annual years

351 Climate warming is a global trend (IPCC, 2013), and the Tibetan Plateau, as the  
352 third pole, is no exception. According to our statistics, the air temperature in Bomi  
353 County has increased by 1.5° in the last 45 years (1970~2014). Glacier retreat induced  
354 by climate warming has been widely accepted, and recent research suggests the  
355 weaker Indian monsoon could be another reason ( Yao et al, 2012). Glaciers are  
356 always located in concave ground and cover a large amount of glacial tills.  
357 Gravitation of the glacier Glacial pressure can generate normal stress vertical to the  
358 slope, which can strengthen the slope stability. The effect of glaciers on slope stability  
359 is called glacial debuttrressing (Cossart et al, 2008). As deglaciation continues, the  
360 result could lead to exposure of the frozen glacial tills (Figure 10, A to B) and smaller  
361 glacial debuttrressing.

362 The retreat of glaciers and glacial tills with climate warming is quite different.  
363 Deglaciation is accompanied by melting of internal ice particles. The melt of internal  
364 ice particles can produce active surface layer which can obstruct heat flux from  
365 penetrating into the deep layer, result into --the melting of internal ice particles  
366 lagging behind glacial retreat (Hagg et al, 2008). As strong heat gradient is existed at  
367 the surface while quite limited in deep layers, Glacial-glacial tills with thicker  
368 coverage always has a relatively thinner thawing layer, although and the ablation rate  
369 of glaciers and internal ice particles can enjoy the same value at the glacier surface  
370 close to the moraine slope, remain at the same pace at the junction with the slope.

批注 [A23]: comment to reviewer #1:  
scope of soil source ? not clear

批注 [admin24]: comment to reviewer  
1#: gravitation ? do you mean weight ?  
better to talk about pressures

批注 [A25]: comment to reviewer 1#:  
depth instead of coverage  
--the coverage can hinder heat flux into the  
glacial till, and if the glacial is covered by  
thicker, the thawing layer will be thinner.

带格式的: 非突出显示

批注 [A26]: comment to reviewer 1#: not  
clear "at the junction with the slope"

371 ~~Newly~~The newly formed bared glacial till is frozen with high ice content~~and~~  
372 ~~frozen~~, the cohesion of the ice particles renders the bared glacial till with high  
373 shearing strength and stability and only the surface layer is of high activity. Therefore,  
374 we often see many bare moraine slopes near glaciers, for this reason there were no  
375 debris flows of large magnitude in 2006 and 2009 when glacier retreat reached the  
376 maximal.

## 377 (2) Variation-Changing of glacial till in antecedent days

378 After the long term cold winter, the whole glacial tills would become frozen. If  
379 the regressive glacier was not recovered in the winter, the glacial tills would often be  
380 covered by snow. As air temperature increases again, the surface snow would melt  
381 first, followed by the internal ice particles. The thawing of internal ice particles would  
382 induce a series of changes in the glacial till, which include the following: 1) the  
383 thawing will break the bonds of ice particles and increase the instability between ice  
384 cracks (Ryzhkin and Petrenko, 1997; Davies et al, 2001); 2) the sharp air temperature  
385 fluctuation in high alpine mountainous areas induces a repeated cycle of expansion  
386 and contraction in the glacial till that can destroy the mass structure to some extent; 3)  
387 the seepage of ice melt-water can deliver fine-grained sediments that were formerly  
388 frozen in the ice matrix (Rist, 2007); and 4) the ice melt-water can result in a higher  
389 water content and pore water pressure (Christian et al, 2012). These changes in glacial  
390 till can sharply decline the soil strength, shifting to an active mass from the uncovered  
391 and frozen moraine (Figure 10, B to C). Because the heat conduction in glacial till is  
392 quite slow, this process may last for a very long time and also requires a high  
393 antecedent air temperature.

394 Heat conduction via the percolation of rainfall and ice melt-water can amplify  
395 the scope depth of ~~an~~ active of glacial till (Gruber and Haeberli, 2007), whereas the  
396 shelter of surface glacial till can hinder the heat flux from penetrating into the deep  
397 layer~~the internal mass~~. At a low air temperature, the heat flux should be constrained to  
398 the surface layer, and a large heat gradient due to a high air temperature would  
399 contribute much more to the heat flux and ice melt in the deep mass, meaning that the

批注 [A27]: comment to reviewer 1#:  
scope ?

批注 [A28]: comment to reviewer 1#:  
internal mass of what ?

400 long-term effect of a high air temperature can amplify the active glacial till (Åkerman  
401 et al, 2008), under which lies frozen glacial till with a high ice content. The activity of  
402 glacial till change variations with depth, high in the surface and low in the deep layers,  
403 and landslide failure can take place on glacial till slopes in a retrogressive stepwise  
404 manner, coinciding with long-term air temperature fluctuations although the glacial  
405 till is significantly unlimited in deglaciation areas.

### 406 (3) Failure of glacial tills

407 Active glacial till slopes with low strength are usually vulnerable, and their  
408 failure can occur when the air temperature is above 0°C (Arenson and Springman,  
409 2005). Either rainfall, the seepage flow of glacier or ice particle melt-water induced  
410 by prolonged high air temperature could trigger the failure (Figure10, C to D). The  
411 failure mechanism lies in the ablation of internal ice particles and the percolation of  
412 melt-water can that further decreases the soil strength at first (Arenson and Springman,  
413 2005; Decaulne et al, 2005); later, the subsequent rapid percolation of melt-water or  
414 rainfall can saturate the glacial till, and higher pore pressure, seepage force and  
415 gravitation force is produced which can ~~and~~ initiate failure through the decrease of  
416 soil suction and shearing strength (Springman et al, 2003; Decaulne and Sæmundsson,  
417 2007; Chiarle et al, 2007) and increase of downward force.

418 The fluctuation of air temperature within a specific low range can result into  
419 limited seepage flow. Based on the hypothesis that the As glacier in one valley is  
420 limited, it is unlikely for failure to be triggered by the limited ice melt water in  
421 short-term increases in of air temperature; although instead, prolong air temperature  
422 increases can still trigger it it is needed to generate more water flow. Rainfall can  
423 initiate debris flows from active glacial tills with a mechanism similar to that of  
424 storm-induced debris flows in non-glacier areas (Iverson et al, 1997; Springman et al,  
425 2003; Sassa and Wang, 2005). In the European Alps, periglacial debris flows are  
426 mainly provoked by rainfall, which is also related with air temperature fluxes (Stoffel  
427 et al, 2011). The different portion containing melt-water percolation would impact the  
428 rainfall intensity and duration required for periglacial debris flows (Stoffel et al, 2011;

批注 [A29]: comment to reviewer 1#:  
stepwise manner ? not clear.

批注 [A30]: comment to reviewer 1#:  
Figure 10 (especially C and D) is not clear,  
and more detailed description should be  
provided in the caption  
--this process is given in the later part.

带格式的: 突出显示

批注 [A31]: comment to reviewer 1#:  
glacier limited ? maybe till is missing

带格式的: 突出显示

429 Schneuwly-Bollschweiler and Stoffel, 2012); Rainfall intensity and duration may also  
430 require other preconditions, such as the distribution of glaciers and frozen glacial tills  
431 and the terrain of the source area to enhance the debris flow (Lewkowicz and Harris,  
432 2005).

433 The three debris flow events possess similar annual meteorological conditions,  
434 except that the positive air temperature accumulation prior to DF1 was significantly  
435 larger. DF1 occurred at the end of a prolonged period of high air temperature, prior to  
436 this, there were instances of failure but no large-scale debris flows. On July 25<sup>th</sup> 2010  
437 when the daily rainfall particularly reached 20.7 mm, no debris flows were generated  
438 because thick active glacial till was still lacking after small failure events. In 2010, the  
439 largest daily rainfall occurred on June 7<sup>th</sup>, accounting for 37.5 mm, at the beginning of  
440 an air temperature increase when the glacial till was frozen and had low activity. The  
441 lack of glacial till activity was the likely cause of the absence of debris flows. On  
442 August 23<sup>rd</sup>, the daily rainfall was 20.3 mm, the antecedent air temperature  
443 accumulation dated from DF2, and the active glacial till was still under development.  
444 On September 6<sup>th</sup>, the antecedent positive air temperature accumulation was smaller,  
445 and a low air temperature had emerged previously; however, the high rainfall intensity  
446 supplemented this lack of prolonged high air temperature.

## 447 5. Conclusion

448 Climate changes have serious effects on high mountainous areas, and mass  
449 movement of sediments such as periglacial debris flows is increasingly frequent.  
450 Prolonged increases in the mean annual air temperature are regarded as very  
451 favourable for periglacial debris flows. In particular, the annual “hot-dry” weather  
452 condition one or two year earlier was responsible for the three debris flow events in  
453 Tianmo valley. Debris flow is usually not initiated in the year when the mean annual  
454 air temperature spikes as in the first year because the melting of internal ice particles  
455 lags behind the glacial retreat result from the prolong air temperature rise.

456 Glacial till is unlimited in the deglaciated area, while its activity relies on glacial  
457 retreat and internal ice particle melting. Changing of glacial tills induced by

批注 [A32]: comment to reviewer 1#:

is it possible that small events (is failure meaning debris flows? if so should be changed) had cleared the entire source area from active till ?

--the active till is in high area and when it slide along the slope with large gradient, liquefaction can take place to generate debris flows; of course, some can also deposit in the nearby gully for low energy.  
--the small events cannot clear all the active till, or the three large events will be not existed.

批注 [A33]: comment to reviewer 1#:

first year of what ?



458 increasing air temperature is the first step of periglacial debris flows and glacial till  
459 need a four phase experience prior to debris flow occurrence ~~(these include:~~  
460 ~~glacier covered glacial till, uncovered and frozen glacial till, active glacial till and~~  
461 ~~debris flows)~~, during which the varied air temperature condition with different factor  
462 drives the changing. The mean annual air temperature can remove glaciers, decrease  
463 glacial debuitressing and produce bared glacial till; the activity of the frozen glacial  
464 till is quite low and would be enhanced by prolonged high air temperature trends;  
465 active glacial till would fail and generate debris flows from multiple triggers, such as  
466 rainfall or the continuous percolation of ice melt-water. For periglacial debris flows of  
467 a large magnitude, the long-term effect of air temperature is required, although rainfall  
468 can shorten the antecedent period and generate debris flows earlier.

469 It is difficult to observe the changes of glacial till in source areas of debris flow,  
470 and the analysis of the phase conversion of glacial till in this research is based on the  
471 triggering conditions ~~that trigger debris flow~~ and other literatures. Indeed, the  
472 meteorological conditions, such as the antecedent air temperature and meteorological  
473 triggers that drive the phase conversion are partly overlapped and difficult to  
474 distinguish. In the first study, we hope to distinguish the effect of each meteorological  
475 condition and more detail study should be done in further research.

476 **Acknowledgements:** This research was supported by the National Natural Science Foundation  
477 of China (grant No. 41190084, 41402283 and 41371038) and the “135”project of IMHE, CAS. We  
478 wish to acknowledge the editors in the Natural Hazards and Earth System Science Editorial Office  
479 and the anonymous reviewers for constructive comments, which helped us in improving the  
480 contents and presentation of the manuscript.

## 481 **References**

- 482 Åkerman, H. J., and Johansson, M.: Thawing permafrost and thicker active layers in sub-Arctic  
483 Sweden. *Permafrost Periglac*, 19(3), 279-292, 2008.
- 484 Arenson, L. U., and Springman, S. M.: Mathematical descriptions for the behaviour of ice-rich  
485 frozen soils at temperatures close to 0 °C. *Can Geotech J*, 42(2), 431-442, 2005.

批注 [A34]: comment to reviewer 1#:  
the four phases are quite obvious and could  
be skipped

486 Chen, N. S., Zhou, H. B., and Hu, G. S.: Development Rules of Debris Flow under the Influence  
487 of Climate Change in Nyingchi. *Adv Clim Change Res*, 7(6), 412-417, 2011. (In Chinese)

488 Chen, R.: Initiation and the critical condition of Glacial debris flow. Master thesis. Institute of  
489 Mountain Hazards and Environment, Chinese Academic of Sciences. P19, 1991.

490 Cheng, Z. L., Wu, J. S., and Geng, X.: Debris flow dam formation in southeast Tibet. *J Mt Sci*,  
491 2(2), 155-163, 2005.

492 Chiarle, M., Iannotti, S., Mortara, G., and Deline, P.: Recent debris flow occurrences associated  
493 with glaciers in the Alps. *Global Planet Change*, 56:123-136, 2007.

494 Christian, B., Philipp, F., and Hansruedi, S.: Thaw-Consolidation Effects on the Stability of Alpine  
495 Talus Slopes in Permafrost. *Permafrost Periglac*, 23, 267-276, 2012.

496 Cossart, E., Braucher, R., Fort, M., Bourlès, D. L., and Carcaillet, J.: Slope instability in relation to  
497 glacial debuitressing in alpine areas (Upper Durance catchment, southeastern France):  
498 Evidence from field data and <sup>10</sup>Be cosmic ray exposure ages. *Geomorphology*, 95, 3-26,  
499 2008.

500 Cruden, D. M., and Hu, X. Q.: Exhaustion and steady state models for predicting landslide hazards  
501 in the Canadian Rocky Mountains. *Geomorphology*, 8, 279-285, 1993.

502 Davies, M., Hamza, O., and Harris, C.: The effect of rise in mean annual temperature on the  
503 stability of rock slopes containing ice-filled discontinuities. *Permafrost Periglac*, 12(1),  
504 137-144, 2001.

505 Deng, M. F., Chen, N. S., Ding, H. T., and Zhou, C. C.: The Hydrothermal Condition of 2007  
506 Group-occurring Debris Flows and Its Triggering Mechanism in Southeast Tibet. *J Nat Disa*,  
507 22(4), 128-134, 2013. (In Chinese)

508 Decaulne, A., and Sæmundsson, T.: Spatial and temporal diversity for debris-flow meteorological  
509 control in subarctic oceanic periglacial environments in Iceland. *Earth Surf Proc Land*,  
510 32(13), 1971-1983, 2007.

511 Decaulne, A., Sæmundsson, T., Petursson, O.: Debris flows triggered by rapid snowmelt in the  
512 Gleidarhjalli area, northwestern Iceland. *Geografiska Annaler*, 87A, 487-500, 2005 .

513 Evans, S. G., Tutubalina, O., Drobyshev, V. N., Chernomorets, S. S., McDougall, S., Petrakov, D.  
514 A., and Hungr, O.: Catastrophic detachment and high-velocity long-runout flow of Kolka  
515 Glacier, Caucasus Mountains, Russia in 2002. *Geomorphology*, 105(3), 314-321, 2009.

516 Fischer, L., Purves, R. S., Huggel, C., Noetzi, J., and Haeberli, W.: On the influence of  
517 topographic, geological and cryospheric factors on rock avalanches and rockfalls in  
518 high-mountain areas. *Nat Hazard Earth Sys*, 12(1), 241-254, 2012.

519 Ge, Y. G., Cui, P., Su, F. H., Zhang, J. Q., Chen, X. Z.: Case history of the disastrous debris flows

520 of Tianmo Watershed in Bomi County, Tibet, China: Some mitigation suggestions *J Mt Sci*,  
521 11(5), 1253-1265, 2014.

522 Gruber, S., and Haerberli, W.: Permafrost in steep bedrock slopes and its temperature-related  
523 destabilization following climate change. *J Geophys Res*, 112, (F02S18), 2007.

524 Guzzetti, F., Peruccacci, S., Rossi, M., and Stark, C. P.: The rainfall intensity-duration control of  
525 shallow landslides and debris flows: an update. *Landslides*, 5, 3-17, 2008.

526 Harris, C., Arenson, L. U., Christiansen, H. H., Etzelmüller, B., Frauenfelder, R., Gruber, S., ...  
527 and Isaksen, K.: Permafrost and climate in Europe: Monitoring and modeling thermal,  
528 geomorphological and geotechnical responses. *Earth Sci Rev*, 92, 117-171, 2009.

529 Harris, C., and Lewkowicz, A. G.: An analysis of the stability of thawing slopes, Ellesmere Island,  
530 Nunavut, Canada. *Can Geotech J*, 37(2), 449-462, 2002.

531 IPCC. Summary for policymakers. Working group I contribution to the IPCC Fifth assessment  
532 report climate change 2013: the physical science basis. Cambridge, UK: Cambridge  
533 University Press, 2013.

534 Iverson, R. M., Reid, M. E., and LaHusen, R. G.: Debris-flow mobilization from landslides. *Annu*  
535 *Rev Earth Pl Sci*, 25(1), 85-138, 1997.

536 Jakob, M.: A size classification for debris flows. *Engineering geology*, 79(3), 151-161, 2005.

537 Jakob, M., Bovis, M., and Oden, M.: The significance of channel recharge rates for estimating  
538 debris-flow magnitude and frequency, *Earth Surf. Proc. Land.*, 30, 755-766, 2005.

539 Li, Q. Y., and Xie, Z. C.: (2006) Analysis on the characteristics of the vertical lapse rates of  
540 temperature. Taking Tibetan Plateau and its adjacent area as an example. *J Shihezi University*  
541 (Natural Science), 24 (6), 719-723, 2006. (In Chinese).

542 Kean, J. W., McCoy, S. W., Tucker, G. E., Staley, D. M., and Coe, J. A.: Runoff generated debris  
543 flows: observations and modeling of surge initiation, magnitude, and frequency. *J Geophys*  
544 *Res*, 118, 2190-2207, 2013.

545 Korup, O., and Clague, J. J.: Natural hazards, extreme events, and mountain topography.  
546 *Quaternary Sci Rev*, 28, 977-990, 2009.

547 Lewkowicz, A. G., and Harris, C.: Frequency and magnitude of active-layer detachment failures in  
548 discontinuous and continuous permafrost, northern Canada. *Permafrost Periglac*, 16(1),  
549 115-130, 2005.

550 Liu, J. J., Cheng, Z. L., and Su, P. C.: The relationship between air temperature fluctuation and  
551 Glacial Lake Outburst Floods in Tibet, China. *Quatern Int*, 321, 78-87, 2014.

552 Liu, Y.: Research on the typical debris flows chain based on RS in Palongzangbu Basin of Tibet.  
553 Chengdu University of Science and Technology, Master thesis, 2013. (In Chinese)

554 Lu, R. R., and Li, D. J.: Ice-Snow-Melt Debris Flows in the Dongru Longba, Bomi county, Xizang.  
555 J Glac Geocry, 11(2), 148-160, 1989. (In Chinese)

556 McColl, S. T.: Paraglacial rock-slope stability. *Geomorphology*, 153-154, 1-16, 2012.

557 Noetzli, J., Gruber, S., Kohl, T., Salzmann, N., and Haeberli, W.: Three-dimensional distribution  
558 and evolution of permafrost temperatures in idealized high-mountain topography. *J Geophys*  
559 *Res*, 112, F02S13, 2007.

560 Rahardjo, H., Leong, E. C., and Rezaur, R. B.: Effect of antecedent rainfall on pore-water pressure  
561 distribution characteristics in residual soil slopes under tropical rainfall. *Hydrol Process*,  
562 22(4), 506-523, 2008.

563 Rango, A., and Martinec, J.: Revisiting the degree-day method for snowmelt computations.  
564 *JAWRA Journal of the American Water Resources Association*, 31(4), 657-669, 1995.

565 Rist, A.: Hydrothermal processes within the active layer above alpine permafrost in steep scree  
566 slopes and their influence on slope stability. Unpublished PhD thesis, Swiss Federal Institute  
567 for Snow and Avalanche Research and University of Zurich, Zurich, 168 pp, 2007.

568 Ryzhkin, I. A., and Petrenko, V. F.: Physical mechanisms responsible for ice adhesion. *J Phys*  
569 *Chem B*, 101(32), 6267-6270, 1997.

570 Sassa, K., and Wang, G. H.: Mechanism of landslide-triggered debris flows: Liquefaction  
571 phenomena due to the undrained loading of torrent deposits[M]//Debris-flow hazards and  
572 related phenomena. Springer Berlin Heidelberg. 81-104, 2005.

573 Sattler, K., Keiler, M., Zischg, A., and Schrott, L., On the connection between debris flow activity  
574 and permafrost degradation: a case study from the Schnalstal, South Tyrolean Alps,  
575 Italy. *Permafrost Periglac*, 22(3), 254-265, 2011.

576 Schneuwly-Bollschweiler, M., and Stoffel, M.: Hydrometeorological triggers of periglacial debris  
577 flows in the Zermatt valley (Switzerland) since 1864. *J Geophys Res*, 117, F02033, 2012.

578 Shang, Y. J., Yang Z. F., Li, L., Liu, D. A., Liao, Q., Wang, Y.: A super-large landslide in Tibet in  
579 2000: background, occurrence, disaster, and origin. *Geomorphology*, 54(3), 225-243, 2003.

580 Springman, S. M., Jommi, C., and Teyssere, P.: Instabilities on moraine slopes induced by loss of  
581 suction: a case history. *Géotechnique*, 53(1), 3-10, 2003.

582 Stoffel, M., Bollschweiler, M., and Beniston, M.: Rainfall characteristics for periglacial debris  
583 flows in the Swiss Alps: past incidences–potential future evolutions. *Climatic Change*,  
584 105(1-2), 263-280, 2011.

585 Stoffel, M., and Huggel, C.: Effects of climate change on mass movements in mountain  
586 environments. *Prog Phys Geog*, 36(3), 421-439, 2012.

587 Takahashi, T.: Debris flow: mechanics, prediction and countermeasures. CRC Press, 2014.

588 The Ministry of Land and Resources P. R. C.: China Geological Hazard Bulletin(September  
589 edition), 2010.

590 Yao, T. D., Thompson, L., Yang, W., Yu, W., Gao, Y., Guo, X., ... and Pu, J.: Different glacier  
591 status with atmospheric circulations in Tibetan Plateau and surroundings. *Nature Climate*  
592 *Change*, 2(9), 663-667, 2012.

593 Yang, W., Guo, X., Yao, T., Zhu, M., and Wang, Y. Recent accelerating mass loss of southeast  
594 Tibetan glaciers and the relationship with changes in macroscale atmospheric  
595 circulations. *Clim Dynam*, 1-11, 2015.

596 Yang, W., Yao, T., Xu, B., Ma, L., Wang, Z., and Wan, M. Characteristics of recent temperate  
597 glacier fluctuations in the Parlung Zangbo River basin, southeast Tibetan Plateau. *Chinese*  
598 *Sci Bull*, 55(20), 2097-2102, 2010.

599 Yuan, G.X., Ding, R. W., Shang, Y. J., Zeng, Q. L.: Genesis of the Quaternary accumulations along  
600 the Palong section of the Sichuan-Tibet Highway and Their Distribution Regularities.  
601 *Geology and Exploration*, 48(1), 170-176, 2012. ( In Chinese)  
602

603

604 Table 1 Changing of glacier, snow, bared land, gully deposition and vegetation in Tianmo valley

| Year | Glacier<br>(km <sup>2</sup> ) | Glacier(eastern branch)<br>(km <sup>2</sup> ) | Snow<br>(km <sup>2</sup> ) | Bared land<br>(km <sup>2</sup> ) | Gully deposition<br>(km <sup>2</sup> ) | Vegetation<br>(km <sup>2</sup> ) |
|------|-------------------------------|-----------------------------------------------|----------------------------|----------------------------------|----------------------------------------|----------------------------------|
| 2000 | 1.77                          | 0.16                                          | 2.13                       | 2.80                             | 0.44                                   | 10.46                            |
| 2003 | 1.71                          | 0.15                                          | 2.44                       | 2.54                             | 0.44                                   | 10.48                            |
| 2006 | 1.53                          | 0.12                                          | 2.68                       | 2.44                             | 0.44                                   | 10.55                            |
| 2009 | 1.45                          | 0.096                                         | 2.81                       | 3.03                             | 0.47                                   | 9.90                             |
| 2013 | 1.42                          | 0.088                                         | 1.74                       | 3.83                             | 0.51                                   | 10.17                            |

605

606 Table 2 Basic information of the debris flows in Tianmo and the nearby valleys

| No. | Name              | Coordinates        | Basin area<br>(km <sup>2</sup> ) | Glacier area<br>(in 2006) (km <sup>2</sup> ) | Date         | Size class |
|-----|-------------------|--------------------|----------------------------------|----------------------------------------------|--------------|------------|
| 1   | Tianmo<br>valley  | 29°59'N<br>95°19'E | 17.74                            | 1.53                                         | 4 Sep. 2007  | 6          |
|     |                   |                    |                                  |                                              | 25 Jul. 2010 | 5          |
|     |                   |                    |                                  |                                              | 6 Sep. 2010  | 5          |
| 2   | Kangbu<br>valley  | 30°16'N<br>94°48'E | 48.7                             | 1.06                                         | 4 Sep. 2007  | 3          |
| 3   | Xuewa<br>valley   | 29°57'N<br>95°23'E | 33.22                            | 0.95                                         | 4 Sep. 2007  | 2          |
| 4   | Baka<br>valley    | 29°53'N<br>95°33'E | 22.15                            | 2.46                                         | 7 Sep. 2007  | 3          |
| 5   | Jiaqing<br>Valley | 30°16'N<br>94°49'E | 15.51                            | 1.12                                         | 9 Sep. 2007  | 3          |

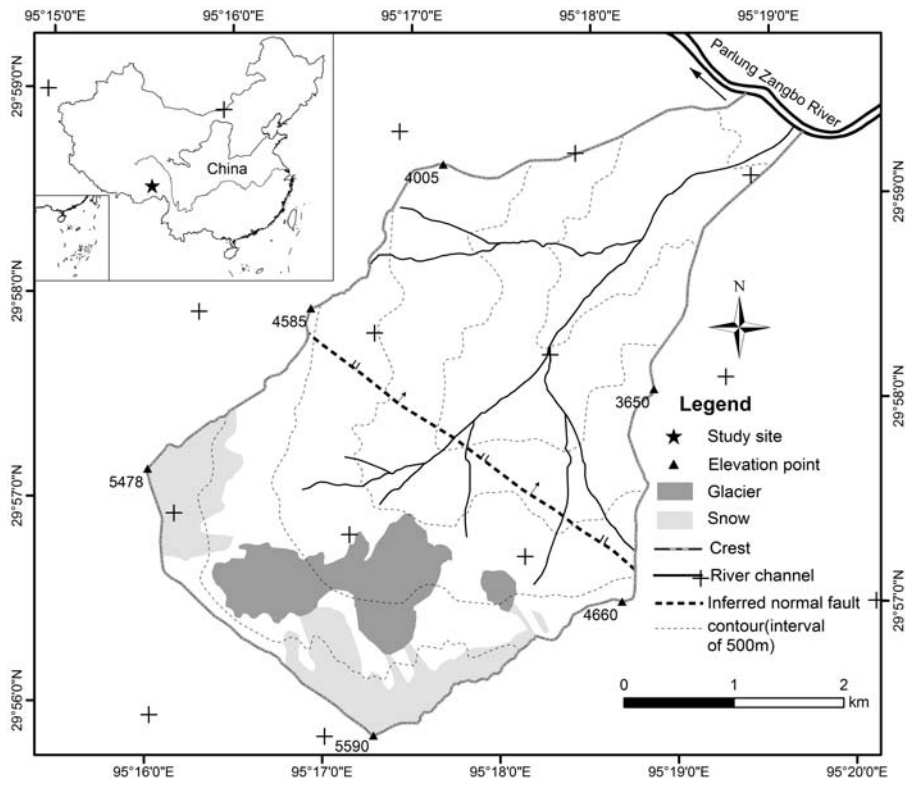

607  
608

Figure 1 Location and basic information of Tianmo Valley

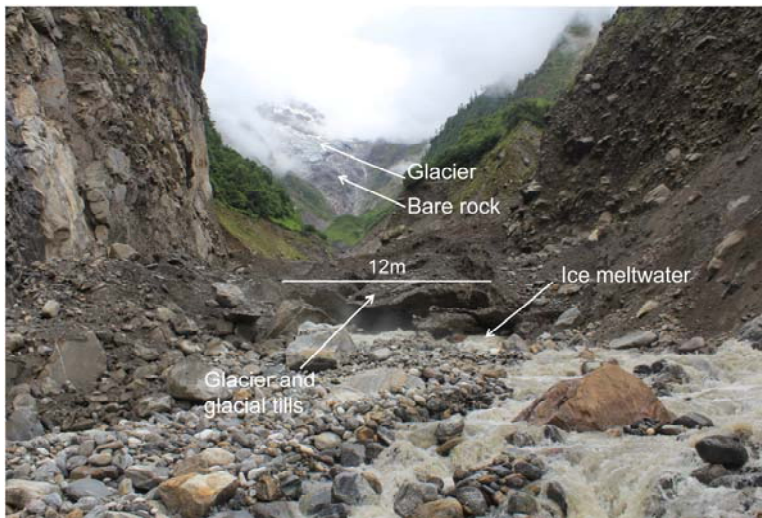

609  
610

Figure 2 Overview of the valley from the channel(in 2014)

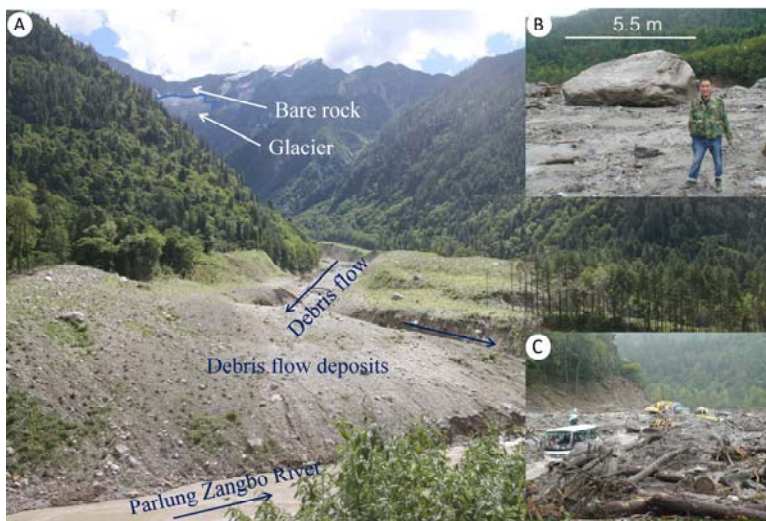

611

612

Figure 3 DF1 in 2007(A. Overview of Tianmo debris flows from the downstream area; B& C.

613

Boulder and debris flow deposits on the north side of the Parlung Zangbo River)

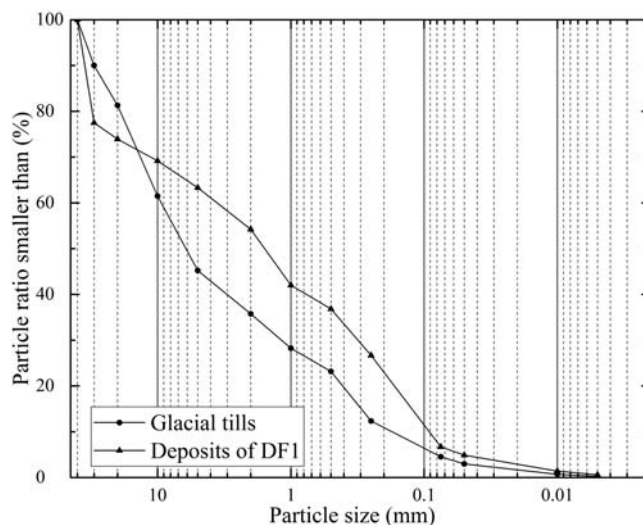

614

615

Figure 4 Particle size distributions of the glacial tills and debris flow deposits



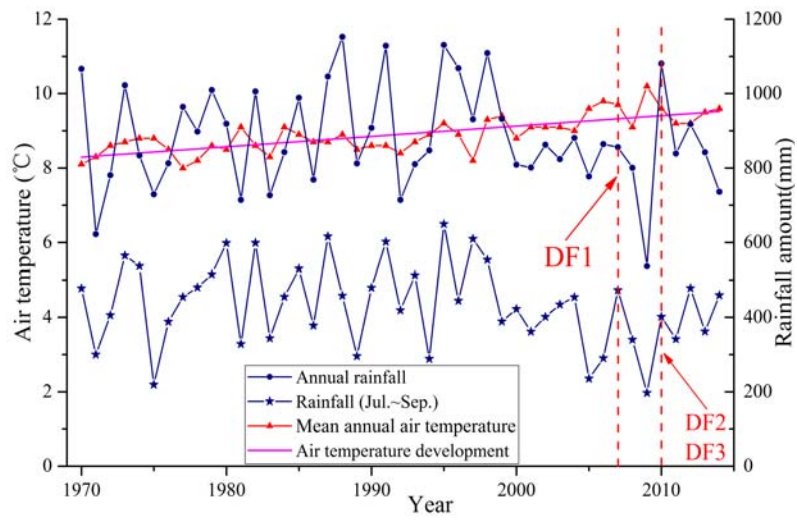

616

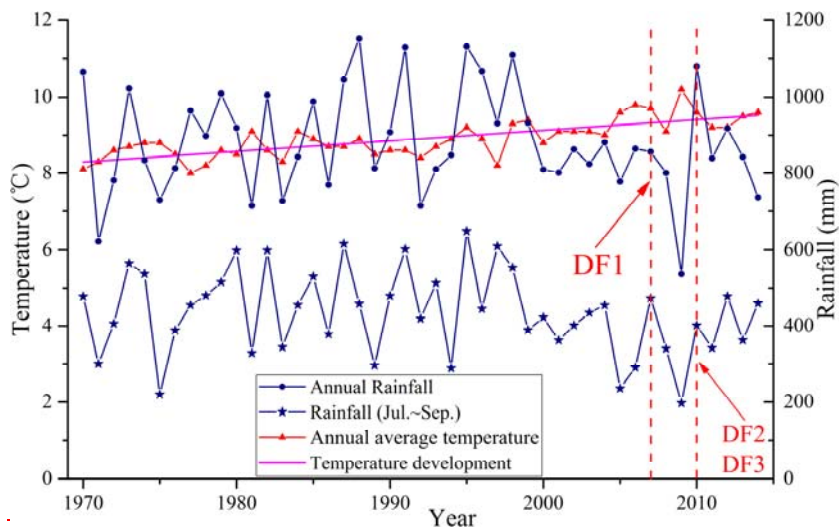

617

618

Figure 5 Variation of the mean annual air temperature and rainfall in Bomi, 1970 to 2014

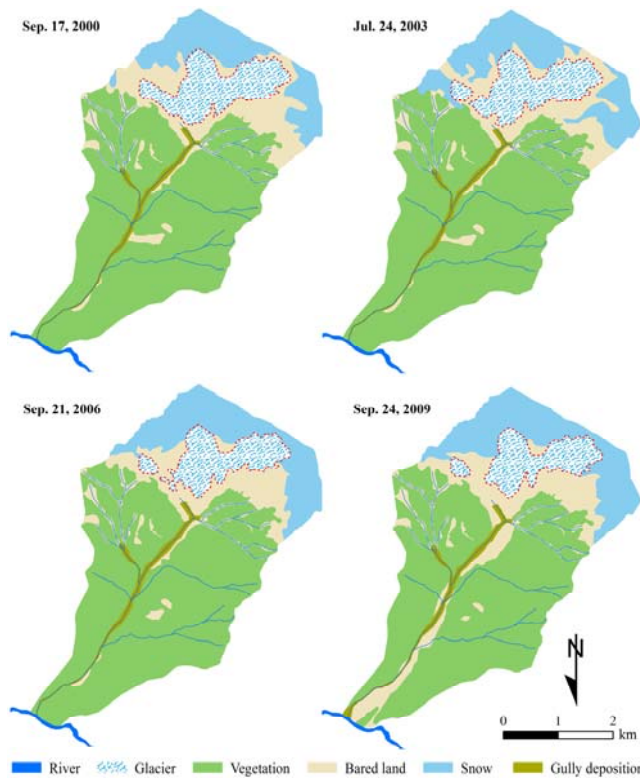

619  
620  
621  
622

Figure 6 Distribution and changing of glacier, snow, bared land, gully deposition and vegetation in Tianmo valley

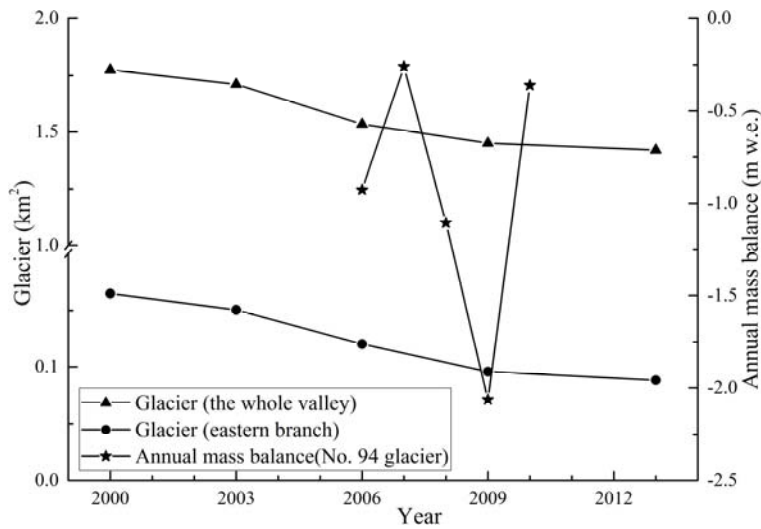

623  
624  
625

Figure 7 Changing of glacier via time and the measured annual mass balance for the Parlung No. 94 Glacier (mass balance is edited by Yang et al.(2015))

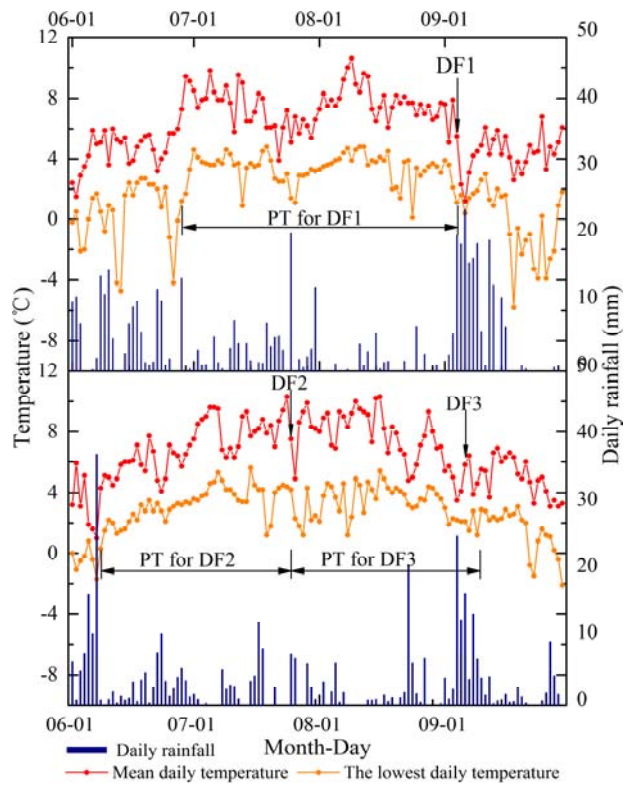

626  
627

Figure 8 Air temperature and rainfall before and after DF1, DF2 and DF3

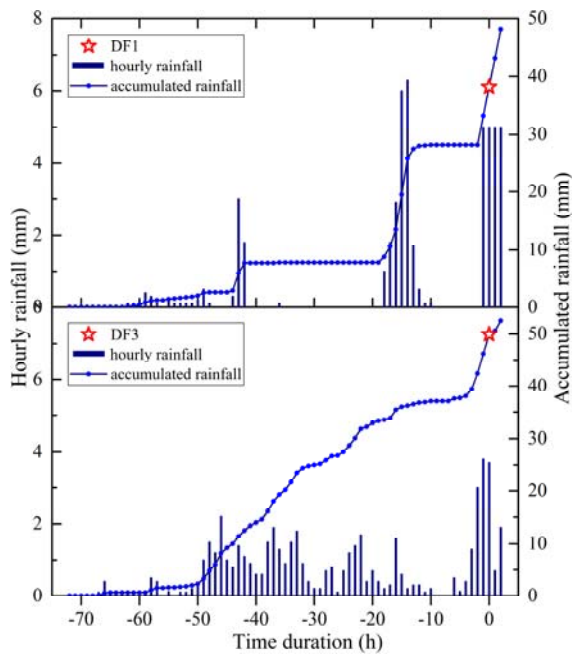

628  
629

Figure 9 Variation of the rainfall accumulation prior to DF1 and DF3 (no rainfall before DF2)

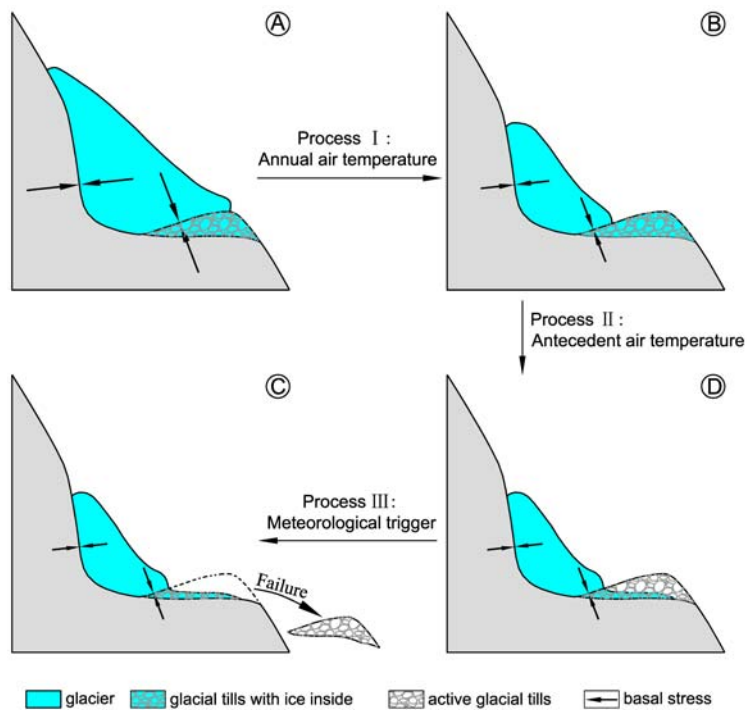

630

631

632

633

Figure 10 Changes in a glacier and frozen glacial till before periglacial debris flow initiation (A: glacial covered glacial tills; B: uncovered and frozen glacial tills; C: active glacial tills; D: failure of glacial tills)
