# Supplementary material for: Meteorological factors driven glacial till changing and the associated periglacial debris flows in Tianmo Valley, southeast Tibetan Plateau
Source: Copernicus journal article supplement (doi:10.5194/nhess-2016-251), 2016-07-29
Supplement: Supplementary file [file nhess-2016-251-AC2-supplement.pdf]

# Meteorological factors driving glacial till variation and the associated periglacial debris flows in Tianmo Valley, southeast Tibetan Plateau

M. F. Deng<sup>1,2</sup>, N. S. Chen<sup>1\*</sup>, and M. Liu<sup>1,2</sup>

(<sup>1</sup> Key Laboratory of Mountain Hazards and Surface Process, Institute of Mountain Hazards and Environment, Chinese Academy of Sciences, Chengdu 610041, China;

<sup>2</sup> University of Chinese Academic of Sciences, Beijing 100049, China)

Abstract: Meteorological studies have indicated that high Alpines are strongly affected by climate warming. Periglacial debris flows are ~~more~~-frequent in deglaciated regions. The combination of rainfall and air temperature controls the initiation of periglacial debris flows; and the addition of melt-water due to higher air temperatures enhances the complexity of the triggering mechanism compared to storm-induced debris flows. In south-eastern Tibetan Plateau where temperate glaciers are widely distributed, numerous periglacial debris flows have occurred in the past 100 years, but none had happened in the Tianmo watershed until 2007. In 2007 and 2010, three large-scale debris flows occurred in the Tianmo watershed. In this research, these three debris flow events were chosen to analyze the impact of the annual meteorological conditions: the antecedent air temperature and meteorological triggers. TM images and field measurement of the nearby glacier suggested that a sharp glacier retreat had existed in the previous one or two years preceding the events, which coincided with the spiked mean annual air temperature. Besides, changing of glacial tills driven by prolonged increase in the air temperature is the prerequisite of periglacial debris flows. Triggers of periglacial debris flows are multiplied and they could be high intensity rainfall as in ~~DF1~~first debris flows and ~~DF3~~the third debris flows, or continuous ~~percolation of melt water due to the~~ long term rising air temperatures as in ~~DF2~~the second debris flows.

## 1. Introduction

The alpine environments are strongly vulnerable to climate changes, of which the alpine glaciers and permafrost are the most sensitive in the form of glacier and permafrost degradation (Harris et al, 2009; IPCC, 2013). Glacier and permafrost retreat can induce mass movement, such as landslides, shallow slides, debris, moraine collapses, etc. (Cruden and Hu, 1993; Korup, 2009; McColl, 2012; Stoffel and Huggel, 2012; Fischer et al, 2012), that will be expelled out of the watershed in the form of debris flows or sediment flux. The debris flow in alpine areas can often bury

32 residential areas, cut off main roads and block rivers (Shang et al, 2003; Cheng et al,  
33 2005; Deng et al, 2013) and destroy basic facilities located in downstream, posing a  
34 great threat to the local economy and social development. In undeveloped alpine areas  
35 such as the south-eastern Tibet where the transportation system is particularly poor or  
36 limited, the negative effects produced by debris flows such as cutting off main roads  
37 are serious (Cheng et al, 2005).

38 Periglacial debris flows occurs in the high alpine areas where there is large areas  
39 of glaciers, such as the Tibetan Plateau in China(Shang et al, 2003; Ge et al, 2014),  
40 Alps in Europe(Sattler et al, 2011; Stoffel and Huggel,2012), Caucasus Mountains in  
41 Russia(Evans et al, 2009) and northern Canada(Lewkowicz1 and Harris, 2005).  
42 Periglacial debris flows were reported to be initiated by rainfall (Stoffel et al, 2011;  
43 Schneuwly-Bollschweiler and Stoffel, 2012), melt-water flow of glacier or ice particle  
44 ablation(Arenson and Springman, 2005; Decaulne et al, 2005), or outburst floods  
45 from glacier lakes (Chiarle et al, 2007) in different parts of the world, while the  
46 multi-triggers for the case is rarely to be read. Because debris flows are commonly  
47 triggered by rainfall (Sassa and Wang, 2005; Decaulne et al, 2007; Kean et al, 2013;  
48 Takahashi, 2014), the rainfall threshold, intensity and duration has been widely used  
49 for debris flow monitoring and giving warning in non-glacier areas (Guzzetti et al,  
50 2008).

51 In deglaciation areas, the debris flow threshold can be more difficult to determine.  
52 Periglacial debris flows tend to occur in the summer when the thawing of glaciers and  
53 glacial tills predominates and melt-water penetrates into the glacial tills at a constant  
54 and successive flow. The effect of melt-water appears similar to that of antecedent  
55 rainfall (Rahardjo et al, 2008) and is variable in different periods, considering snow  
56 and glacier shrinkage and air temperature fluctuation. In the Swiss Alps, melt-water is  
57 high in early summer, and as debris flows can be initiated by low total rainstorm,  
58 whereas higher total rainstorm are required in late summer or early autumn when the  
59 melt-water is low (Stoffel et al, 2011; Schneuwly-Bollschweiler and Stoffel, 2012). In  
60 south-eastern Tibetan Plateau, the rainfall threshold given by Chen et al., (2011) is  
61 quite wide, and the small rainfall threshold in particular is likely to contain the effect

62 of air temperature. Moreover, periglacial debris flows induced by a sudden release of  
63 water from glacier lakes have a close relationship with the rising air temperature (Liu  
64 et al, 2014).

65 Fluctuation of air temperature is likely to be quite important in triggering  
66 periglacial debris flows. Compared with the storm induced debris flows, the addition  
67 of air temperature can greatly enhance the complexity of the initiation of periglacial  
68 debris flows. It is of high difficulty to simulate the triggering process by experiment  
69 or mathematical simulation, and instead, debris flows cases in the natural environment  
70 could be applied. In this research, three debris flow events, after a debris-flow-free  
71 period of nearly 100-year, in the Tianmo watershed of the southeastern of the Tibetan  
72 Plateau as deglaciation continued are used as examples, and the annual meteorological  
73 conditions, antecedent air temperature and triggering conditions prior to debris flows  
74 are analyzed to further understand the meteorological triggers and their roles in  
75 glacier retreat, glacial till variation and debris flow initiation.

## 76 **2. Background**

### 77 **(1) Study area**

78 The temperate glacier in the Tibetan Plateau is primarily distributed in the  
79 Parlung Zangbo Basin and covered a total landmass of 2381.47 km<sup>2</sup> in 2010 based on  
80 TM images (Liu, 2013). Historically, the movement of temperate glacier has produced  
81 a large amount of moraines, the depth of which can reach up to 500 m locally (Yuan et  
82 al, 2007). In recent decades, there has been a dynamic significant increase in  
83 temperature and according to statistics the temperature at the Bomi meteorological  
84 station (midstream in the Parlung Zangbo Basin) has rose by 0.23°C/10a from 1969 to  
85 2007, resulting in remarkable shrinkage of the glacier (Yang et al, 2010).

86 Tianmo Valley, located in Bomi County and to the south of the Parlung Zangbo  
87 River, covers an area of 17.76 km<sup>2</sup> (29°59'N/95°19'E; Figure 1). This valley has a  
88 northeast-southeast orientation and is surrounded by high mountains reaching 5590 m  
89 a.s.l. at the southernmost site and 2460 m a.s.l. at the junction of the Parlung Zangbo

90 River. The TM image in 2013 showed the presence of a hanging glacier with an area  
91 of 1.42 km<sup>2</sup> in the upper concave area at an altitude of 4246 m to 4934 m. Bared rock,  
92 dipping at an angle of around 60°, emerged below and above the hanging glacier and  
93 often covered by everlasting snow. Below 3800m a.s.l., vegetation, including forest  
94 and shrub, occupies most of the area (Table 1).

95 The river channel in the watershed is sheltered by shade and not directly affected  
96 by sunlight, resulting in less solar radiation and a location at which a small trough  
97 glacier can form. In the main channel, the trough glacier extended to 2966 m a.s.l. in  
98 2006. The lower part of the trough glacier has been eroded by glacier melt-water flow,  
99 and an arch glacier that is vulnerable to high pressure was formed (Figure 2). The  
100 remnants of the landslide deposits approximately 10 meters high, which consist of low  
101 stability sediment and can be easily entrained by debris flows, can be observed in both  
102 sides of the channel.

103 Tianmo Valley is on the north side of the bend in the Yarlung Zangbo River and  
104 is strongly affected by the new tectonic movement. An inferred normal fault vertical  
105 to the channel cuts through the valley and is only 30 km away from the Yarlung  
106 Zangbo fault. In 1950, a rather significant earthquake (Ms. 8.6) hit Zayu, which is  
107 only 200 km away, and local records reported that a large amount of rock collapsed  
108 and landslides were produced at that time. The whole valley is in a strong ductile  
109 deformation zone and is dominated by gneissic lithology belonging to Presinian  
110 System.

## 111 **(2) Disaster history**

112 According to our field interview with local residents, there were no debris flows  
113 in approximately 100 years prior to 2007 in Tianmo Valley. The channel was quite  
114 narrow before 2007, and the local people could walk across via a wooden bridge to  
115 live and farm on the terrace on the west side. On the morning of Sep. 4<sup>th</sup>, 2007, after  
116 the rainfall which did not hit the downstream area ceased, the local forest guard heard  
117 a loud noise coming from the upstream area at approximately 18:00; with rainfall  
118 which later began in the upstream area at approximately 19:00, following this rainfall

119 was debris flows which rushed out of the Tianmo Channel and subsequently blocked  
120 the Parlung Zangbo River; report stated that several debris flows occurred, lasting the  
121 entire night. According to the field measurements, approximately 1,340,000 m<sup>3</sup> of  
122 sediment was transported during this event, resulting in 8 missing persons and deaths.  
123 Concurrently within this same time, debris flows occurred in the four nearby valleys  
124 (Table 2). According to the size classification proposed by Jakob (2005), which is  
125 based on the total volume, peak discharge and inundated area, Size class of debris  
126 flows in the five valleys is given in Table 2. [This debris flows is listed as DF1 in this](#)  
127 [paper.](#)

128 At 11:30 on Jul. 25<sup>th</sup>, 2010, debris flows were again triggered in Tianmo Valley  
129 that traced the path of the preceding debris flow deposits and reached the other side of  
130 the Parlung Zangbo River. According to Ge et al., (2014), solid mass sediment of  
131 approximately 500,000 m<sup>3</sup> was carried out (Table 1) and deposited on the cone to  
132 block the main river. A barrier lake was formed, and the rising water destroyed the  
133 roadbed of G318. The following week also experienced dozens of debris flows in  
134 small magnitude. [This debris flows is listed as DF2 in this paper.](#)

135 Debris flows occurred again two months later on Sep. 6<sup>th</sup> (The Ministry of Land  
136 and Resources P. R. C., 2010), although we could not determine the exact times  
137 sequence of event but according to speculation, these debris flows could have  
138 occurred in the early morning before dawn and when the rainfall intensity has reached  
139 its maximum(Figure 9), which agrees with the findings of Chen (1991) that periglacial  
140 debris flows have historically occurred between 18:00~24:00 in this area. The debris  
141 barrier in the main river was consequently increased by an additional 450,000 m<sup>3</sup>, and  
142 the barrier lake was enlarged to maintain 9,000,000 m<sup>3</sup> of water. [This debris flows is](#)  
143 [listed as DF3 in this paper.](#)

144 A field investigation revealed that a high percentage of boulders in the  
145 downstream area and glacial tills above the trough glacier were quite loose and of  
146 high porosity (Figure 2), hence they have low density and can be easily entrained. Our  
147 particle size tests on the glacial tills and debris flow deposits indicate a lower clay  
148 (d<0.005 mm) content, whereas the debris flow deposits contain more fine particles

149 that are smaller than 10 mm (Figure 4), suggesting that the entrainment supplied a  
150 considerable amount of fine particles.

### 151 **(3) Meteorological data**

152 The study area is located in a high alpine area where the economy is quite  
153 undeveloped with only few meteorological stations. Before 2011, the Bomi  
154 meteorological station(since 1955) was the only station in the area, located 54 km  
155 away from Tianmo valley at an altitude of 2730 m, and other stations were located  
156 more than 200 km away.

157 The Tibetan Plateau is a massive terrace that obstructs the Indian monsoon,  
158 causing it to travel through the Yarlung Zangbo Canyon and its tributaries. As the  
159 Indian monsoon is transported to higher altitudes, a rainfall gradient emerges in the  
160 Parlung Zangbo Basin. However, according to our statistics on rainfall data in the area,  
161 the rainfall often enjoys the similar intensity for the long-term rainfall process from  
162 Guxiang to Songzong which means the there is no large rainfall gradient between  
163 Tianmo valley and Bomi meteorological station; therefore, the rainfall data from the  
164 Bomi meteorological station can be used for our study. In order to conduct further  
165 study, another meteorological station was built in 2011 near Tianmo Valley.

166 It has been established that the air temperature decreases with altitude; therefore  
167 the air temperature in the source area of Tianmo Valley is lower than that in Bomi  
168 County. According to the research by Li and Xie (2006), the air temperature decreases  
169 at a rate of  $(0.46\sim 0.69)^{\circ}\text{C}/100\text{m}$  over the whole Tibetan Plateau, and the rate in the  
170 study area is  $0.54^{\circ}\text{C}/100\text{ m}$ . Because the glacier and permafrost in the source area  
171 have a planar distribution, the air temperature at the geometric centre of the glacier  
172 and permafrost can be used to analyze the temperature process.

## 173 **3. Analysis and results**

### 174 **(1) Changing of air temperature and rainfall**

175 The mean annual air temperature is usually used to reflect the tendency of glacier

176 change (Yang et al, 2015). We collected the mean annual air temperature and annual  
177 rainfall data from 1970 to 2014 from the Bomi meteorological station (Figure 5). The  
178 record showed that the mean air temperature has increased by approximately 1.5°C in  
179 the last 45 years, accounting for 0.033°C/a. This air temperature increase was  
180 particularly more rapid between 2005~2007, an approximately 0.7°C/3a, which is 7  
181 times the average value of the last 45 years. On the other hand, the annual rainfall  
182 from 2000 to 2010 was low and it was estimated at 828.2 mm per year. From 2000 to  
183 2004, the rainfall during summer (July to September) accounted for approximately 50%  
184 of the total annual rainfall; however, only 32% of the rainfall occurred in the summer  
185 of 2005~2006, even though the annual rainfall exhibited the same trend. In 2007,  
186 rainfall in the summer and the entire year returned to the mean rainfall state.

187 According to Figure 5, a similar trend in the air temperature and rainfall was  
188 observed before DF2 and DF3. The air temperature elevated in 2009 to reach the  
189 maximum of the last 45 year period, accounting for 10.2 °C; however, the annual  
190 rainfall, was only 65% of the average amount; and the summer rainfall, lower than  
191 that in 2005 and 2006, reached their minimum values. In 2010, the rainfall was  
192 abundant and the annual rainfall increased to 1080.6 mm, which is approximately 30%  
193 more than the average value and close to the maximum.

194 The following common traits can be identified from comparing the annual  
195 meteorological conditions of DF1, DF2 and DF3. 1) One or two years before the  
196 debris flows, the mean annual temperature elevated and the annual rainfall and  
197 summer rainfall declined. The climate was in a "hot-dry" state. 2) As the temperature  
198 gradually decreased, the annual rainfall returned to normal or increased, and the  
199 "hot-wet" climate contributed to debris flow initiation (Lu and Li, 1989).

## 200 **(2) Changing of glacier in Tianmo valley**

201 In our research, remote image is collected to analyze the changing of glacier in  
202 the source area during the past years. In order to eliminate the effect of snow cover,  
203 images were taken in the thawing seasons when the snow cover is limited to enable an  
204 easy detection of the glacier from snow. Besides, a bright cloud is still needed to show

205 the watershed clearly; however a difficult case ensues when the rainy season comes  
206 in-between the thawing season when the atmosphere is often covered by thick cloud.  
207 Further, in order to show glacier retreat and its impact on debris flows properly, the  
208 images should be within similar time interval, like 3 years, before and after debris  
209 flow events. As the high resolution images are rare to obtain and we could only collect  
210 one SPOT image (Takeb by the satellite of Systeme Probatoire d'Observation de la  
211 Terre with a space resolution of 5m) in 2008. To achieve consistency of the images,  
212 we collected 5 TM images image (Taken by No. 4 or 5 thematic mapper carried on the  
213 satellite Landsat with a space resolution of 30m), taken on Sep. 17<sup>th</sup>, 2000, Jul. 24<sup>th</sup>,  
214 2003, Sep. 21<sup>st</sup>, 2006, Sep. 24<sup>th</sup>, 2009 and Aug. 4<sup>th</sup>, 2013, respectively.

215 Based on the 5 TM images, we classified the area as glacier, snow, bared land,  
216 gully deposition and vegetation in time series (Figure 6), and the area of each is given  
217 in Table 1. Figure 6 showed that deglaciation was taking place in Tianmo valley and  
218 in particular, the eastern branch had experienced the sharpest deglaciation. In order to  
219 show clearly the rapid rate of glacier retreat, a graph was plotted to show the changing  
220 of glacier and the eastern branch in Figure 7.

221 Figure 7 shows that glacier in Tianmo valley had been in shrinkage since 2000 to  
222 2013, with variation in glacier retreat rate. In 2000~2003, 2003~2006, 2006~2009 and  
223 2009~2013, the glacier retreat rate in Tianmo valley corresponds to 0.02, 0.06, 0.027  
224 and 0.0075km<sup>2</sup>/a and 0.0033, 0.01, 0.008 and 0.002 km<sup>2</sup>/a for the eastern branch.  
225 According to these figures the largest glacier retreat rate was in 2003~2006, followed  
226 by that in 2006~2009. It is important that glacier area at the beginning should be taken  
227 into consideration to judge the changing rate of glacier. The glacier retreat rate is  
228 normalized and the relative glacier retreat rate can be calculated based on theis area  
229 changing.

230 The relative glacier retreat rate are 11.30, 35.09, 17.43 and 5.17 10<sup>-3</sup>km<sup>2</sup>/a/km<sup>2</sup>  
231 during 2000~2003, 2003~2006, 2006~2009 and 2009~2013, respectively; whereas, it  
232 is 20.83, 66.67, 66.67 and 20.83 10<sup>-3</sup>km<sup>2</sup>/a/km<sup>2</sup> for the eastern branch. These figures  
233 show that the relative glacier retreat rate for the eastern branch had shrunk much more  
234 sharply between 2000 ~2013.

带格式的: 英语(美国)

带格式的: 英语(美国)



235 In this research, TM images with 3 year intervals were applied can only get the  
236 mean glacier retreat rate. As glacier retreat rate in the 3 three years could be either  
237 high or low, field measurement of the nearby glacier is used to show the glacier retreat  
238 condition before debris flows. Yang et al.(2015) had conducted field measurement of  
239 No.94 Glacier in Parlung Zangbo Basin since 2006 and the field measurement  
240 suggests it was in negative balance in 2006~2010(Figure 7). The negative balance  
241 reached the maximal in 2009, followed by 2008 and 2006, indicating sharp  
242 deglaciation in these three years.

243 When we combined the result of TM image and filed measurement of No. 94  
244 Glacier, we observed that it is right before debris flows that glacier in Tianmo valley  
245 experienced the sharpest deglaciation in 2006, 2008 and 2009, which was also  
246 coincidental with the elevated mean annual air temperature (Figure 5). Besides, the  
247 maximum glacier retreat in 2009 could be also related to the decline of snowfall in the  
248 preceding winter and early spring..

### 249 **(3) Antecedent air temperature and rainfall process**

250 The air temperature in the source area can be obtained using the vertical decline  
251 rate (0.54°C/100 m). According to this method, the air temperature in the source area  
252 was 9.8°C lower than that at the Bomi meteorological station. We collected the daily  
253 temperature; that is the lowest temperature, the mean temperature and daily rainfall  
254 from June to September in 2007 and 2010 (Figure 8).

255 According to Figure 8, the lowest air temperature was below 0 at the end of June,  
256 2007. At the beginning of July, the air temperature started to rise quickly which  
257 continued until early September when DF1 occurred, this demonstrates that the high  
258 air temperature in July and August contributed to DF1.

259 According to Figure 8, the air temperature was high from early July to late  
260 August, and another high air temperature period emerged in early September. When  
261 DF2 occurred in late July the air temperature had reached the maximum for that year,  
262 which suggests that the air temperature in early and middle July was responsible for  
263 DF2. After DF2 occurred, the air temperature in August began to prepare for DF3.

264 Antecedent air temperature fluctuation includes the air temperature and its  
265 duration. The air temperature and duration before debris flows are variable, making  
266 them difficult to evaluate. The accumulation of positive air temperature is usually  
267 applied to analyze the impact of air temperature on glacier melting (Rango and  
268 Martinec, 1995), which can be expressed as:

$$269 \quad T_{PT} = \sum_{i=-n}^0 T_i (T_i > 0) \quad (1)$$

270 Where  $T_{PT}$  is the positive air temperature accumulation, °C and  $T_i$  is the  
271 average daily air temperature; only  $T_i > 0$  is included.

272 Because air temperature is successive, it is difficult to determine the beginning of  
273 positive air temperature accumulation. Glacial tills can lessen the heat that penetrates  
274 into them, and the low air temperature can only contribute to the upper thin layer;  
275 moreover, freeze-thaw cycles exist when the lowest air temperature is less than 0°C.  
276 From this point of view, the beginning of positive air temperature accumulation is  
277 defined as the time at which the lowest air temperature exceeds 0°C for two or three  
278 successive days or the last debris flow.

279 Based on the above method, we can deduce that the positive air temperature  
280 accumulation began when the lowest air temperature exceeded 0°C for several  
281 successive days, starting on June 28<sup>th</sup>, 2007 and June 9<sup>th</sup>, 2010 corresponding to DF1  
282 and DF2, respectively, and on July 26<sup>th</sup>, 2010 for DF3, following DF2. The duration  
283 and  $T_{PT}$  were calculated for each debris flow event, the result was 69 days and  
284 517.9°C, 47 days and 332.1°C, 42 days and 320.4°C (Figure 8) for DF1, DF2, and  
285 DF3, respectively. The result showed that  $T_{PT}$  for DF1 is much larger than the other  
286 two, and which is coincidence to the fact that there was no debris flows in the past  
287 dozens of years and extraordinary external forces such as larger  $T_{PT}$  is required to  
288 destroyed the long-term balance.

289 **(4) Triggering conditions**

290 The continuous nature of the air temperature limits the possibility for debris  
291 flows triggered by a sole abrupt increase in air temperature; and since the previous air  
292 temperature trend cannot be neglected, it is of no sense to study air temperature  
293 triggers.

294 Antecedent rainfall is a factor that favours debris flows. In our analysis, the  
295 rainfall over the three days preceding a debris flow event is given in Figure 9.

296 Before DF1, the air temperature was high, and continued through July and  
297 August. The  $T_{PT}$  reached 517.9°C. According to the local forest guard, an isolated  
298 convective storm occurred prior to DF1 though no rainfall was recorded at the Bomi  
299 meteorological station or in the downstream area at that time. In Figure 9, as the  
300 rainfall right before DF1 occurred was not recorded by Bomi metrological station, we  
301 added to the rainfall intensity (about 5 mm/h according to the description of the  
302 forest guard) before DF1 to account for the storm, which ~~might does~~ not reflect the  
303 ~~real~~ rainfall ~~during storm conditions~~process. We can therefore conclude that this  
304 isolated convective storm initiated DF1, while the long-term high air temperature  
305 trend had paved the road for DF1. Considering a large deglaciaded area, several other  
306 periglacial debris flows simultaneously also occurred near Tianmo Valley (Deng et al,  
307 2013), which suggests the advantageous meteorological conditions for debris flow  
308 initiation.

309 DF2 took place when the air temperature reached the peak in 2010. The thaw  
310 season began in the middle of June, and the  $T_{PT}$  reached 332.1°C. On July 24<sup>th</sup>, one  
311 day before DF2, the air temperature reached the maximum value for that year. The  
312 rainfall record at the Bomi meteorological station shows that there had been no  
313 rainfall several days preceding DF2, and the local citizens also did not observe any  
314 rain either. The trigger of DF2 was likely the continuous percolation of melt-water  
315 due to the long term rising air temperature.

316 According to field interviews, several debris flows of small magnitude had also

317 occurred before DF3. The air temperature decreased in late August but increased to  
318 another high peak before DF3, and the  $T_{PT}$  reached 320.4°C. Rainfall began 2 days  
319 prior to DF3 and was steady the entire day before DF3. According to the rainfall trend  
320 at the Bomi meteorological station, the rapid increase in rainfall intensity started 4  
321 hours before DF3 and reached 3.8 mm/h, which was responsible for the initiation of  
322 DF3.

#### 323 **4. Discussion**

324 Debris flows initiation is the process when water source provokes the movement  
325 of soil sediment. In this research, we found that the three debris flows were triggered  
326 by high air temperature and rainfall in DF1, high air temperature in DF2, and rainfall  
327 in DF3 respectively. When we analyzed the date and the triggers for these events,  
328 various questions came to mind that gave reasons to doubts: 1) Why debris flows did  
329 not occur in 2006 or 2009 when deglaciation reached its peak and more ice melt water  
330 was present; 2) Why DF1 and DF3 occurred in September when the air temperature  
331 and the ice melt water was decreasing; 3) Why was there is no large scale debris flows  
332 triggered by the previous heavier storm. It makes us believe that the impact of water  
333 source on the magnitude and frequency of debris flows is quite low, or there could be  
334 much more debris flows; and instead, soil source, including its magnitude and activity,  
335 should be the predominate controller, just as Jakob et al., (2005) pointed out that the  
336 recharge of channel should be the prerequisite for debris flows. However, in most  
337 situations we cannot reach the source area to detect the soil source and the high-tech  
338 remote sensing can just distinguish the boundary of soil source. In the periglacial area  
339 where the glacial till is often covered by glacier or everlasting snow, changing of soil  
340 source seems to be of high difficulty to detect. In this research, we try to combine the  
341 meteorological condition and the literatures to discuss the probable variation of glacial  
342 tills before debris flows.

##### 343 **(1) Variation of glacial till in annual years**

344 Climate warming is a global trend (IPCC, 2013), and the Tibetan Plateau, as the

345 third pole, is no exception. According to our statistics, the air temperature in Bomi  
346 County has increased by 1.5° in the last 45 years (1970~2014). Glacier retreat induced  
347 by climate warming has been widely accepted, and recent research suggests the  
348 weaker Indian monsoon could be another reason ( Yao et al, 2012). Glaciers are  
349 always located in concave ground and cover a large amount of glacial tills. Glacial  
350 pressure can generate normal stress vertical to the slope, which can strengthen the  
351 slope stability. The effect of glaciers on slope stability is called glacial debuttinging  
352 (Cossart et al, 2008). As deglaciation continues, the result could lead to exposure of  
353 the frozen glacial tills (Figure 10, A to B) and smaller glacial debuttinging.

354 The retreat of glaciers and glacial tills with climate warming is quite different.  
355 Deglaciation is accompanied by melting of internal ice particles. The melt of internal  
356 ice particles can produce active surface layer which can obstruct heat flux from  
357 penetrating into the deep layer, result into the melting of internal ice particles lagging  
358 behind glacial retreat (Hagg et al, 2008). As strong heat gradient is existed at the  
359 surface while quite limited in deep layers, glacial tills with thicker coverage always  
360 has a relatively thinner thawing layer, and the ablation rate of glaciers and internal ice  
361 particles can enjoy the same value at the glacier surface close to the moraine slope.  
362 The newly formed bared glacial till is frozen with high ice content, the cohesion of the  
363 ice particles renders the bared glacial till with high shearing strength and stability and  
364 only the surface layer is of high activity. Therefore, we often see many bare moraine  
365 slopes near glaciers, for this reason there were no debris flows of large magnitude in  
366 2006 and 2009 when glacier retreat reached the maximal.

## 367 **(2) Variation of glacial till in antecedent days**

368 After the long term cold winter, the whole glacial tills would become frozen. If  
369 the regressive glacier was not recovered in the winter, the glacial tills would often be  
370 covered by snow. As air temperature increases again, the surface snow would melt  
371 first, followed by the internal ice particles. The thawing of internal ice particles would  
372 induces a series of changes in the glacial till, which include the following: 1) the  
373 thawing will break the bonds of ice particles and increase the instability between ice

374 cracks (Ryzhkin and Petrenko, 1997; Davies et al, 2001); 2) the sharp air temperature  
375 fluctuation in high alpine mountainous areas induces a repeated cycle of expansion  
376 and contraction in the glacial till that can destroy the mass structure to some extent; 3)  
377 the seepage of ice melt-water can deliver fine-grained sediments that were formerly  
378 frozen in the ice matrix (Rist, 2007); and 4) the ice melt-water can result in a higher  
379 water content and pore water pressure (Christian et al, 2012). These changes in glacial  
380 till can sharply decline the soil strength, shifting to an active mass from the uncovered  
381 and frozen moraine (Figure 10, B to C). Because the heat conduction in glacial till is  
382 quite slow, this process may last for a very long time and also requires a high  
383 antecedent air temperature.

384 Heat conduction via the percolation of rainfall and ice melt-water can amplify  
385 the depth of active of glacial till (Gruber and Haeberli, 2007), whereas the shelter of  
386 surface glacial till can hinder the heat flux from penetrating into the deep layer. At a  
387 low air temperature, the heat flux should be constrained to the surface layer, and a  
388 large heat gradient due to a high air temperature would contribute much more to the  
389 heat flux and ice melt in the deep mass, meaning that the long-term effect of a high air  
390 temperature can amplify the active glacial till (Åkerman et al, 2008), under which lies  
391 frozen glacial till with a high ice content. The activity of glacial till variations with  
392 depth, high in the surface and low in the deep layers, and landslide failure can take  
393 place on glacial till slopes in a retrogressive manner, coinciding with long-term air  
394 temperature fluctuations although the glacial till is significantly unlimited in  
395 deglaciation areas.

### 396 (3) Failure of glacial tills

397 Failure of glacial could be diversity. Active glacial till slopes with low strength  
398 are usually vulnerable, and their failure can occur when the air temperature is above  
399 0°C (Arenson and Springman, 2005). Either rainfall, the seepage flow of glacier or ice  
400 particle melt-water ~~induced by prolonged high air temperature~~ could percolate the tills  
401 and trigger the failure (Figure10, C to D). This kind is called the shallow landslide  
402 type, and ~~the~~ failure mechanism lies in the ablation of internal ice particles and the

403 | percolation of melt-water can ~~further~~ decreases the soil strength at first (Arenson and  
404 | Springman, 2005; Decaulne et al, 2005); later, the subsequent rapid percolation of  
405 | melt-water or rainfall can saturate the glacial till decrease soil suction and shearing  
406 | strength and then trigger the shallow landslide failure (Springman et al, 2003;  
407 | Decaulne and Sæmundsson, 2007; Chiarle et al, 2007). Whether the failure can induce  
408 | debris flows is still dependent on the ability that it can entrain the debris layer,  
409 | otherwise, it can deposit and charge the channel.

410 | Another kind of failure can take place by the increased water stream that entrain  
411 | sediments and forms a solid-liquid wave if the channel is charged with loose ravel.  
412 | This kind of water stream could be the combination of the three factors, including  
413 | rainfall, melting ice or the overflow when the glacier collapse falling down into the  
414 | downwards water pool. The runoff can generate debris flows when a peaked runoff  
415 | flow over debris deposits(Kean et al., 2012; Gregoretti et al., 2016) and pose  
416 | hydrodynamic forces acting on the surface elements of the debris layer(Tognacca et al.  
417 | 2000, Gregoretti, 2000). The concentration of runoff in the channel bottom causes  
418 | erosion of the debris surface layer and then extends to the layers below with whole or  
419 | partial mobilization of the bed material. The inclusion of bed material in the water  
420 | stream generates debris flow (Gregoretti, 2008).

421 | ~~and higher pore pressure, seepage force and gravitation force is produced which~~  
422 | ~~can initiate failure through the decrease of soil suction and shearing strength~~  
423 | ~~(Springman et al, 2003; Decaulne and Sæmundsson, 2007; Chiarle et al, 2007) and~~  
424 | ~~increase of downward force.~~

425 | The fluctuation of air temperature within a specific low range can result into  
426 | limited seepage flow. As glacier in one valley is limited, it is unlikely for failure to be  
427 | triggered by the limited ice melt water in short-term increases of air temperature;  
428 | instead, prolong air temperature increases it is needed to generate more water flow.  
429 | Rainfall can initiate debris flows from active glacial tills with a mechanism similar to  
430 | that of storm-induced debris flows in non-glacier areas (Iverson et al, 1997;  
431 | Springman et al, 2003; Sassa and Wang, 2005; Gregoretti, 2008; Kean et al., 2012). In  
432 | the European Alps, periglacial debris flows are mainly provoked by rainfall, which is

433 also related with air temperature fluxes (Stoffel et al, 2011). The portion of rainfall  
434 and air temperature required for debris flows triggering could be negative. Air  
435 temperature increase causes melting and water runoff, and the rainfall needed for  
436 providing the percolating flows or exact critical discharge for debris flow triggering  
437 would be much less. Beside, ~~the different portion containing melt water percolation~~  
438 would impact the rainfall intensity and duration required for periglacial debris flows  
439 (Stoffel et al, 2011; Schneuwly Bollschweiler and Stoffel, 2012); Rainfall he required  
440 rainfall, like the intensity and duration, may also require other preconditions, such as  
441 the distribution of glaciers and frozen glacial tills and the terrain of the source area to  
442 enhance the debris flow (Lewkowicz and Harris, 2005).

443 The three debris flow events possess similar annual meteorological conditions,  
444 except that the positive air temperature accumulation prior to DF1 was significantly  
445 larger. DF1 occurred at the end of a prolonged period of high air temperature, prior to  
446 this, there were instances of failure but no large-scale debris flows. On July 25<sup>th</sup> 2010  
447 when the daily rainfall particularly reached 20.7 mm, no debris flows were generated  
448 because thick active glacial till was still lacking after small failure events. In 2010, the  
449 largest daily rainfall occurred on June 7<sup>th</sup>, accounting for 37.5 mm, at the beginning of  
450 an air temperature increase when the glacial till was frozen and had low activity. The  
451 lack of glacial till activity was the likely cause of the absence of debris flows. On  
452 August 23<sup>rd</sup>, the daily rainfall was 20.3 mm, the antecedent air temperature  
453 accumulation dated from DF2, and the active glacial till was still under development.  
454 On September 6<sup>th</sup>, the antecedent positive air temperature accumulation was smaller,  
455 and a low air temperature had emerged previously; however, the high rainfall intensity  
456 supplemented this lack of prolonged high air temperature.

## 457 **5. Conclusion**

458 Climate changes have serious effects on high mountainous areas, and mass  
459 movement of sediments such as periglacial debris flows is increasingly frequent.  
460 Prolonged increases in the mean annual air temperature are regarded as very  
461 favourable for periglacial debris flows. In particular, the annual “hot-dry” weather



462 condition one or two year earlier was responsible for the three debris flow events in  
463 Tianmo valley. Debris flow is usually not initiated in the year when the mean annual  
464 air temperature spikes as the melting of internal ice particles lags behind the glacial  
465 retreat result from the prolong air temperature rise.

466 Glacial till is unlimited in the deglaciated area, while its activity relies on glacial  
467 retreat and internal ice particle melting. Changing of glacial tills induced by  
468 increasing air temperature is the first step of periglacial debris flows comparing with  
469 the storm induced debris flows in non-glacier area. ~~and glacial~~Glacial till need a  
470 four phase experience prior to debris flow occurrence, during which the varied air  
471 temperature condition with different factor drives the changing and temperature series  
472 can remove glaciers, produce bared glacial till and enhance the activity step by step. ~~-~~  
473 Debris flows could occur when enough active glacial till is existed and rainfall  
474 induced water runoff is more likely to generate debris flows.~~-~~

475 ~~The mean annual air temperature can remove glaciers, decrease glacial~~  
476 ~~debuttressing and produce bared glacial till; the activity of the frozen glacial till is~~  
477 ~~quite low and would be enhanced by prolonged high air temperature trends; active~~  
478 ~~glacial till would fail and generate debris flows from multiple triggers, such as rainfall~~  
479 ~~or the continuous percolation of ice melt water. For periglacial debris flows of a large~~  
480 ~~magnitude, the long term effect of air temperature is required, although rainfall can~~  
481 ~~shorten the antecedent period and generate debris flows earlier.~~

482 It is difficult to observe the changes of glacial till in source areas of debris flow,  
483 and the analysis of the phase conversion of glacial till in this research is based on the  
484 triggering conditions and other literatures. Indeed, the meteorological conditions, such  
485 as the antecedent air temperature and meteorological triggers that drive the phase  
486 conversion are partly overlapped and difficult to distinguish. In the first study, we  
487 hope to distinguish the effect of each meteorological condition and more detail study  
488 should be done in further research.

489 **Acknowledgements:** This research was supported by the National Natural Science Foundation  
490 of China (grant No. 41190084, 41402283 and 41371038) and the “135”\_project of IMHE, CAS.

491 We wish to acknowledge the editors in the Natural Hazards and Earth System Science Editorial  
492 Office and the anonymous reviewers for constructive comments, which helped us in improving the  
493 contents and presentation of the manuscript.

## 494 **References**

- 495 Åkerman, H. J., and Johansson, M.: Thawing permafrost and thicker active layers in sub-Arctic  
496 Sweden. *Permafrost Periglac*, 19(3), 279-292, 2008.
- 497 Arenson, L. U., and Springman, S. M.: Mathematical descriptions for the behaviour of ice-rich  
498 frozen soils at temperatures close to 0 °C. *Can Geotech J*, 42(2), 431-442, 2005.
- 499 Chen, N. S., Zhou, H. B., and Hu, G. S.: Development Rules of Debris Flow under the Influence  
500 of Climate Change in Nyingchi. *Adv Clim Change Res*, 7(6), 412-417, 2011. (In Chinese)
- 501 Chen, R.: Initiation and the critical condition of Glacial debris flow. Master thesis. Institute of  
502 Mountain Hazards and Environment, Chinese Academic of Sciences. P19, 1991.
- 503 Cheng, Z. L., Wu, J. S., and Geng, X.: Debris flow dam formation in southeast Tibet. *J Mt Sci*,  
504 2(2), 155-163, 2005.
- 505 Chiarle, M., Iannotti, S., Mortara, G., and Deline, P.: Recent debris flow occurrences associated  
506 with glaciers in the Alps. *Global Planet Change*, 56:123-136, 2007.
- 507 Christian, B., Philipp, F., and Hansruedi, S.: Thaw-Consolidation Effects on the Stability of Alpine  
508 Talus Slopes in Permafrost. *Permafrost Periglac*, 23, 267-276, 2012.
- 509 Cossart, E., Braucher, R., Fort, M., Bourlès, D. L., and Carcaillet, J.: Slope instability in relation to  
510 glacial debuitressing in alpine areas (Upper Durance catchment, southeastern France):  
511 Evidence from field data and 10Be cosmic ray exposure ages. *Geomorphology*, 95, 3-26,  
512 2008.
- 513 Cruden, D. M., and Hu, X. Q.: Exhaustion and steady state models for predicting landslide hazards  
514 in the Canadian Rocky Mountains. *Geomorphology*, 8, 279-285, 1993.
- 515 Davies, M., Hamza, O., and Harris, C.: The effect of rise in mean annual temperature on the  
516 stability of rock slopes containing ice-filled discontinuities. *Permafrost Periglac*, 12(1),  
517 137-144, 2001.
- 518 Deng, M. F., Chen, N. S., Ding, H. T., and Zhou, C. C.: The Hydrothermal Condition of 2007  
519 Group-occurring Debris Flows and Its Triggering Mechanism in Southeast Tibet. *J Nat Disa*,  
520 22(4), 128-134, 2013. (In Chinese)
- 521 Decaulne, A., and Sæmundsson, T.: Spatial and temporal diversity for debris-flow meteorological  
522 control in subarctic oceanic periglacial environments in Iceland. *Earth Surf Proc Land*,

523 32(13), 1971-1983, 2007.

524 Decaulne, A., Sæmundsson, T., Petursson, O.: Debris flows triggered by rapid snowmelt in the  
525 Gleidarhjalli area, northwestern Iceland. *Geografiska Annaler*, 87A, 487-500, 2005 .

526 Evans, S. G., Tutubalina, O., Drobyshev, V. N., Chernomorets, S. S., McDougall, S., Petrakov, D.  
527 A., and Hungr, O.: Catastrophic detachment and high-velocity long-runout flow of Kolka  
528 Glacier, Caucasus Mountains, Russia in 2002. *Geomorphology*, 105(3), 314-321, 2009.

529 Fischer, L., Purves, R. S., Huggel, C., Noetzi, J., and Haeberli, W.: On the influence of  
530 topographic, geological and cryospheric factors on rock avalanches and rockfalls in  
531 high-mountain areas. *Nat Hazard Earth Sys*, 12(1), 241-254, 2012.

532 Ge, Y. G., Cui, P., Su, F. H., Zhang, J. Q., Chen, X. Z.: Case history of the disastrous debris flows  
533 of Tianmo Watershed in Bomi County, Tibet, China: Some mitigation suggestions *J Mt Sci*,  
534 11(5), 1253-1265, 2014.

535 [Gregoretti, C.: The initiation of debris flow at high slopes: experimental results. \*Journal of\*](#)  
536 [Hydraulic Research](#), 38(2): 83-88, 2000.

537 [Gregoretti, C., Degetto, M., Bernard, M., Crucil, G., Pimazzoni, A., De, V.G., Berti, M., Simoni,](#)  
538 [A., Lanzoni, S.: Runoff of small rocky headwater catchments: Field observations and](#)  
539 [hydrological modeling. \*Water Resources Research\*, 52\(8\), doi: 10.1002/2016WR018675,](#)  
540 [2016.](#)

541 [Gregoretti, C., Fontana, G.D.: The triggering of debris flow due to channel-bed failure in some](#)  
542 [alpine headwater basins of the Dolomites: Analyses of critical runoff. \*Hydrological processes\*,](#)  
543 [22\(13\): 2248-2263, 2008.](#)

544 Gruber, S., and Haeberli, W.: Permafrost in steep bedrock slopes and its temperature-related  
545 destabilization following climate change. *J Geophys Res*, 112, (F02S18), 2007.

546 Guzzetti, F., Peruccacci, S., Rossi, M., and Stark, C. P.: The rainfall intensity-duration control of  
547 shallow landslides and debris flows: an update. *Landslides*, 5, 3-17, 2008.

548 Harris, C., Arenson, L. U., Christiansen, H. H., Etzelmüller, B., Frauenfelder, R., Gruber, S., ...  
549 and Isaksen, K.: Permafrost and climate in Europe: Monitoring and modeling thermal,  
550 geomorphological and geotechnical responses. *Earth Sci Rev*, 92, 117-171, 2009.

551 Harris, C., and Lewkowicz, A. G.: An analysis of the stability of thawing slopes, Ellesmere Island,  
552 Nunavut, Canada. *Can Geotech J*, 37(2), 449-462, 2002.

553 IPCC. Summary for policymakers. Working group I contribution to the IPCC Fifth assessment  
554 report climate change 2013: the physical science basis. Cambridge, UK: Cambridge  
555 University Press, 2013.

556 Iverson, R. M., Reid, M. E., and LaHusen, R. G.: Debris-flow mobilization from landslides. *Annu*

557 Rev Earth Pl Sci, 25(1), 85-138, 1997.

558 Jakob, M.: A size classification for debris flows. *Engineering geology*, 79(3), 151-161, 2005.

559 Jakob, M., Bovis, M., and Oden, M.: The significance of channel recharge rates for estimating  
560 debris-flow magnitude and frequency, *Earth Surf. Proc. Land.*, 30, 755-766, 2005.

561 Li, Q. Y., and Xie, Z. C.: (2006) Analysis on the characteristics of the vertical lapse rates of  
562 temperature. Taking Tibetan Plateau and its adjacent area as an example. *J Shihezi University*  
563 (Natural Science), 24 (6), 719-723, 2006. (In Chinese).

564 Kean, J. W., McCoy, S. W., Tucker, G. E., Staley, D. M., and Coe, J. A.: Runoff generated debris  
565 flows: observations and modeling of surge initiation, magnitude, and frequency. *J Geophys*  
566 *Res*, 118, 2190-2207, 2013.

567 Korup, O., and Clague, J. J.: Natural hazards, extreme events, and mountain topography.  
568 *Quaternary Sci Rev*, 28, 977-990, 2009.

569 Lewkowicz, A. G., and Harris, C.: Frequency and magnitude of active-layer detachment failures in  
570 discontinuous and continuous permafrost, northern Canada. *Permafrost Periglac*, 16(1),  
571 115-130, 2005.

572 Liu, J. J., Cheng, Z. L., and Su, P. C.: The relationship between air temperature fluctuation and  
573 Glacial Lake Outburst Floods in Tibet, China. *Quatern Int*, 321, 78-87, 2014.

574 Liu, Y.: Research on the typical debris flows chain based on RS in Palongzangbu Basin of Tibet.  
575 Chengdu University of Science and Technology, Master thesis, 2013. (In Chinese)

576 Lu, R. R., and Li, D. J.: Ice-Snow-Melt Debris Flows in the Dongru Longba, Bomi county, Xizang.  
577 *J Glac Geocry*, 11(2), 148-160, 1989. (In Chinese)

578 McColl, S. T.: Paraglacial rock-slope stability. *Geomorphology*, 153-154, 1-16, 2012.

579 Noetzi, J., Gruber, S., Kohl, T., Salzmann, N., and Haeberli, W.: Three-dimensional distribution  
580 and evolution of permafrost temperatures in idealized high-mountain topography. *J Geophys*  
581 *Res*, 112, F02S13, 2007.

582 Rahardjo, H., Leong, E. C., and Rezaur, R. B.: Effect of antecedent rainfall on pore-water pressure  
583 distribution characteristics in residual soil slopes under tropical rainfall. *Hydrol Process*,  
584 22(4), 506-523, 2008.

585 Rango, A., and Martinec, J.: Revisiting the degree-day method for snowmelt computations.  
586 *JAWRA Journal of the American Water Resources Association*, 31(4), 657-669, 1995.

587 Rist, A.: Hydrothermal processes within the active layer above alpine permafrost in steep scree  
588 slopes and their influence on slope stability. Unpublished PhD thesis, Swiss Federal Institute  
589 for Snow and Avalanche Research and University of Zurich, Zurich, 168 pp, 2007.

590 Ryzhkin, I. A., and Petrenko, V. F.: Physical mechanisms responsible for ice adhesion. *J Phys*

591 Chem B, 101(32), 6267-6270, 1997.

592 Sassa, K., and Wang, G. H.: Mechanism of landslide-triggered debris flows: Liquefaction  
593 phenomena due to the undrained loading of torrent deposits[M]//Debris-flow hazards and  
594 related phenomena. Springer Berlin Heidelberg. 81-104, 2005.

595 Sattler, K., Keiler, M., Zischg, A., and Schrott, L., On the connection between debris flow activity  
596 and permafrost degradation: a case study from the Schnalstal, South Tyrolean Alps,  
597 Italy. *Permafrost Periglac*, 22(3), 254-265, 2011.

598 Schneuwly-Bollscheider, M., and Stoffel, M.: Hydrometeorological triggers of periglacial debris  
599 flows in the Zermatt valley (Switzerland) since 1864. *J Geophys Res*, 117, F02033, 2012.

600 Shang, Y. J., Yang Z. F., Li, L., Liu, D. A., Liao, Q., Wang, Y.: A super-large landslide in Tibet in  
601 2000: background, occurrence, disaster, and origin. *Geomorphology*, 54(3), 225-243, 2003.

602 Springman, S. M., Jommi, C., and Teyssie, P.: Instabilities on moraine slopes induced by loss of  
603 suction: a case history. *Géotechnique*, 53(1), 3-10, 2003.

604 Stoffel, M., Bollschweiler, M., and Beniston, M.: Rainfall characteristics for periglacial debris  
605 flows in the Swiss Alps: past incidences–potential future evolutions. *Climatic Change*,  
606 105(1-2), 263-280, 2011.

607 Stoffel, M., and Huggel, C.: Effects of climate change on mass movements in mountain  
608 environments. *Prog Phys Geog*, 36(3), 421-439, 2012.

609 Takahashi, T.: Debris flow: mechanics, prediction and countermeasures. CRC Press, 2014.

610 The Ministry of Land and Resources P. R. C.: China Geological Hazard Bulletin(September  
611 edition), 2010.

612 [Tognacca, C., Bezzola, G.R., Minor, H. E., Threshold criterion for debris-flow initiation due to  
613 channel bed failure. In: Wieczorek, G.F. \(Ed.\), Proceedings Second International Conference  
614 on Debris Flow Hazards Mitigation: Mechanics. Prediction and Assessment, Taipei, pp.  
615 89-97, 2000.](#)

616 Yao, T. D., Thompson, L., Yang, W., Yu, W., Gao, Y., Guo, X., ... and Pu, J.: Different glacier  
617 status with atmospheric circulations in Tibetan Plateau and surroundings. *Nature Climate  
618 Change*, 2(9), 663-667, 2012.

619 Yang, W., Guo, X., Yao, T., Zhu, M., and Wang, Y. Recent accelerating mass loss of southeast  
620 Tibetan glaciers and the relationship with changes in macroscale atmospheric  
621 circulations. *Clim Dynam*, 1-11, 2015.

622 Yang, W., Yao, T., Xu, B., Ma, L., Wang, Z., and Wan, M. Characteristics of recent temperate  
623 glacier fluctuations in the Parlung Zangbo River basin, southeast Tibetan Plateau. *Chinese  
624 Sci Bull*, 55(20), 2097-2102, 2010.

625 Yuan, G.X., Ding, R. W., Shang, Y. J., Zeng, Q. L.: Genesis of the Quaternary accumulations along  
626 the Palong section of the Sichuan-Tibet Highway and Their Distribution Regularities.  
627 Geology and Exploration, 48(1), 170-176, 2012. ( In Chinese)  
628

629

630 Table 1 Changing of glacier, snow, bared land, gully deposition and vegetation in Tianmo valley

| Year | Glacier<br>(km <sup>2</sup> ) | Glacier(eastern branch)<br>(km <sup>2</sup> ) | Snow<br>(km <sup>2</sup> ) | Bared land<br>(km <sup>2</sup> ) | Gully deposition<br>(km <sup>2</sup> ) | Vegetation<br>(km <sup>2</sup> ) |
|------|-------------------------------|-----------------------------------------------|----------------------------|----------------------------------|----------------------------------------|----------------------------------|
| 2000 | 1.77                          | 0.16                                          | 2.13                       | 2.80                             | 0.44                                   | 10.46                            |
| 2003 | 1.71                          | 0.15                                          | 2.44                       | 2.54                             | 0.44                                   | 10.48                            |
| 2006 | 1.53                          | 0.12                                          | 2.68                       | 2.44                             | 0.44                                   | 10.55                            |
| 2009 | 1.45                          | 0.096                                         | 2.81                       | 3.03                             | 0.47                                   | 9.90                             |
| 2013 | 1.42                          | 0.088                                         | 1.74                       | 3.83                             | 0.51                                   | 10.17                            |

631

632 Table 2 Basic information of the debris flows in Tianmo and the nearby valleys

| No. | Name              | Coordinates        | Basin area<br>(km <sup>2</sup> ) | Glacier area<br>(in 2006) (km <sup>2</sup> ) | Date         | Size class |
|-----|-------------------|--------------------|----------------------------------|----------------------------------------------|--------------|------------|
| 1   | Tianmo<br>valley  | 29°59'N<br>95°19'E | 17.74                            | 1.53                                         | 4 Sep. 2007  | 6          |
|     |                   |                    |                                  |                                              | 25 Jul. 2010 | 5          |
|     |                   |                    |                                  |                                              | 6 Sep. 2010  | 5          |
| 2   | Kangbu<br>valley  | 30°16'N<br>94°48'E | 48.7                             | 1.06                                         | 4 Sep. 2007  | 3          |
| 3   | Xuewa<br>valley   | 29°57'N<br>95°23'E | 33.22                            | 0.95                                         | 4 Sep. 2007  | 2          |
| 4   | Baka<br>valley    | 29°53'N<br>95°33'E | 22.15                            | 2.46                                         | 7 Sep. 2007  | 3          |
| 5   | Jiaqing<br>Valley | 30°16'N<br>94°49'E | 15.51                            | 1.12                                         | 9 Sep. 2007  | 3          |

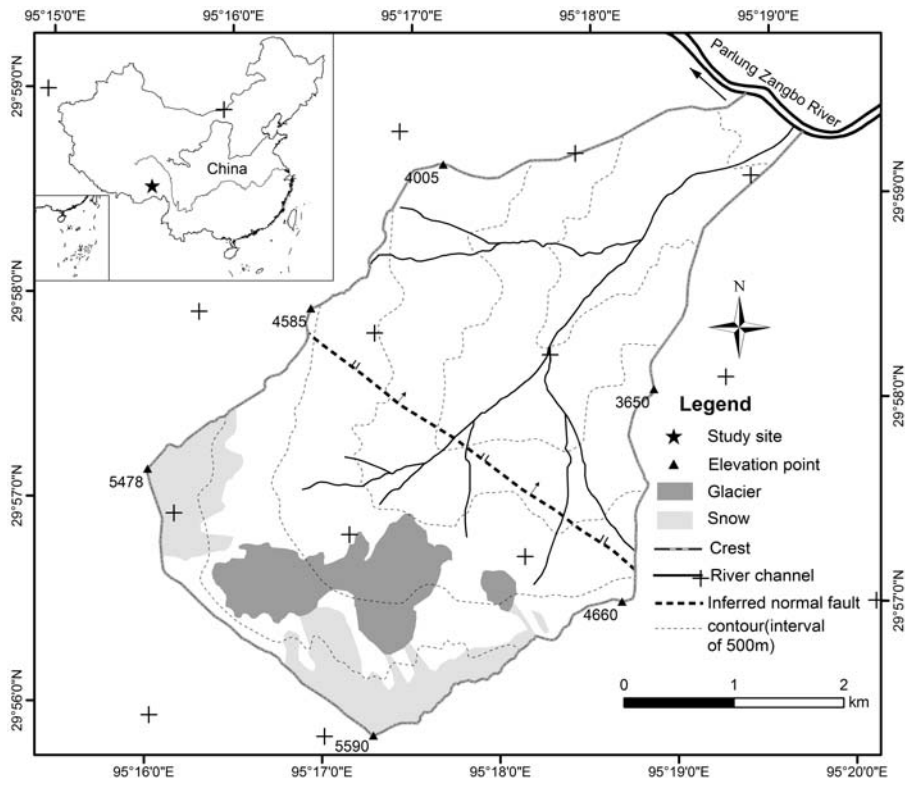

633  
634

Figure 1 Location and basic information of Tianmo Valley

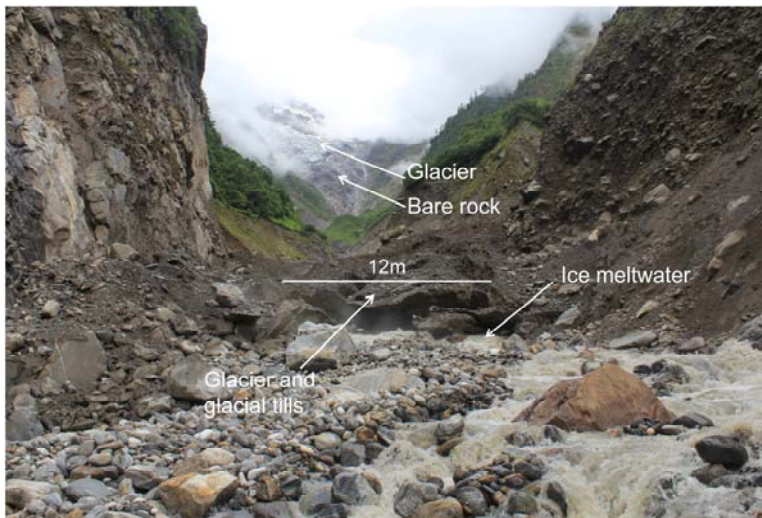

635  
636

Figure 2 Overview of the valley from the channel(in 2014)



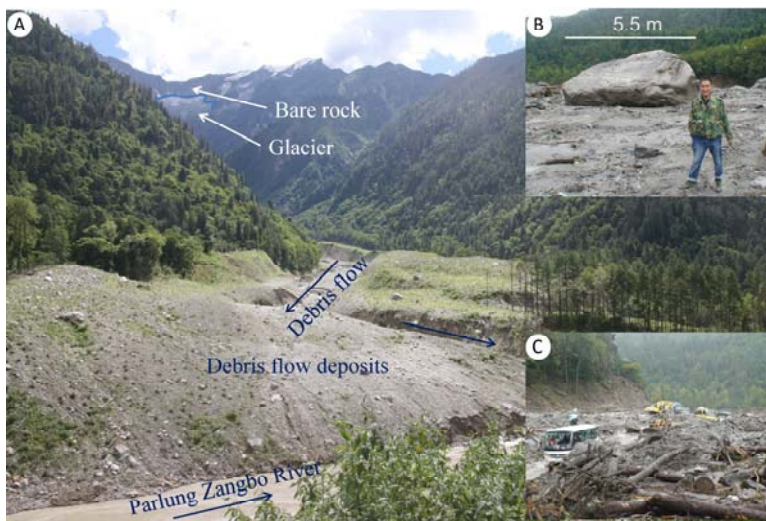

637

638

Figure 3 DF1 in 2007(A. Overview of Tianmo debris flows from the downstream area; B& C.

639

Boulder and debris flow deposits on the north side of the Parlung Zangbo River)

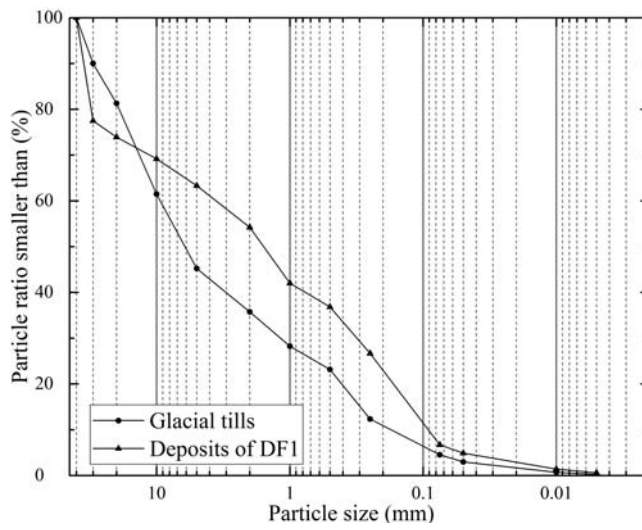

640

641

Figure 4 Particle size distributions of the glacial tills and debris flow deposits

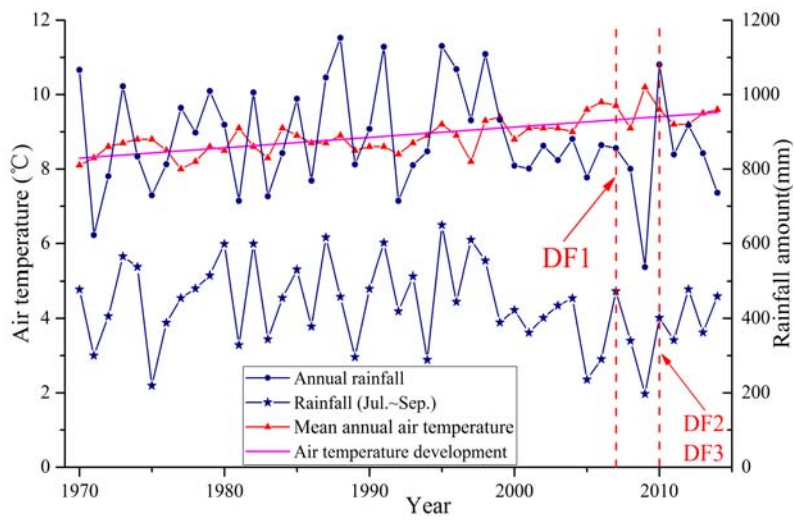

642

643

Figure 5 Variation of the mean annual air temperature and rainfall in Bomi, 1970 to 2014

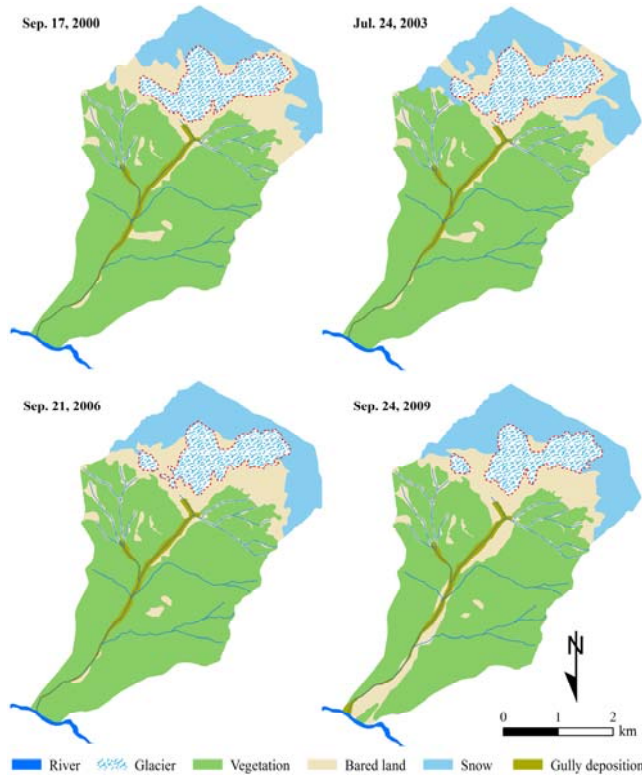

644

645

646

647

Figure 6 Distribution and changing of glacier, snow, bared land, gully deposition and vegetation in Tianmo valley

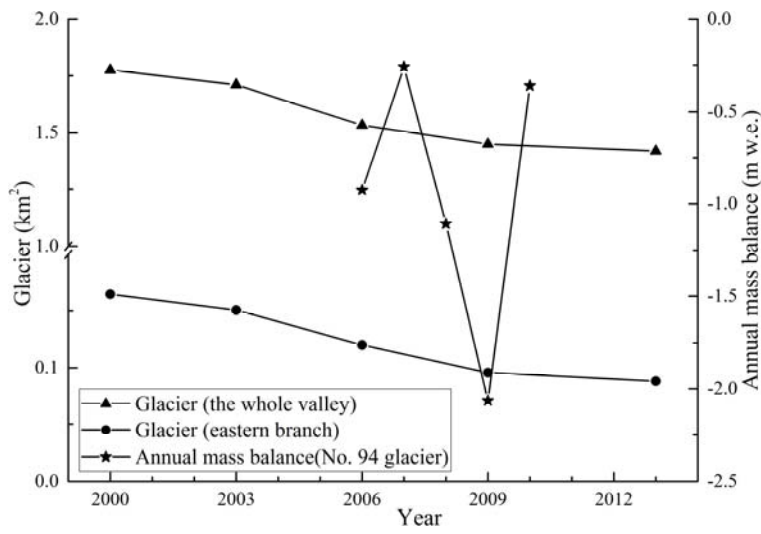

648  
649  
650

Figure 7 Changing of glacier via time and the measured annual mass balance for the Parlung No. 94 Glacier (mass balance is edited by Yang et al.(2015))

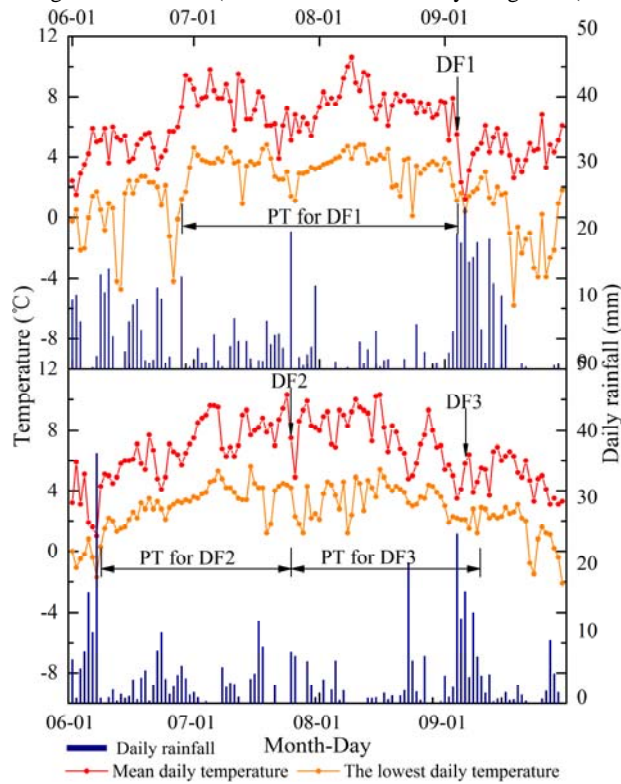

651  
652

Figure 8 Air temperature and rainfall before and after DF1, DF2 and DF3

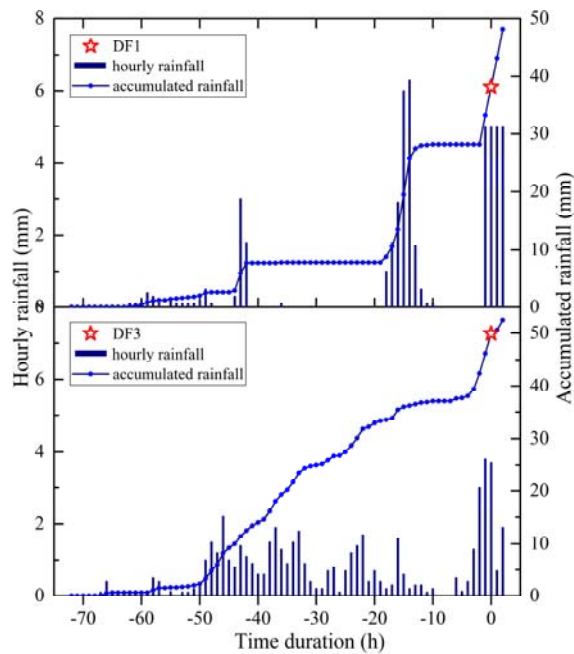

653

654

Figure 9 Variation of the rainfall accumulation prior to DF1 and DF3 (no rainfall before DF2)

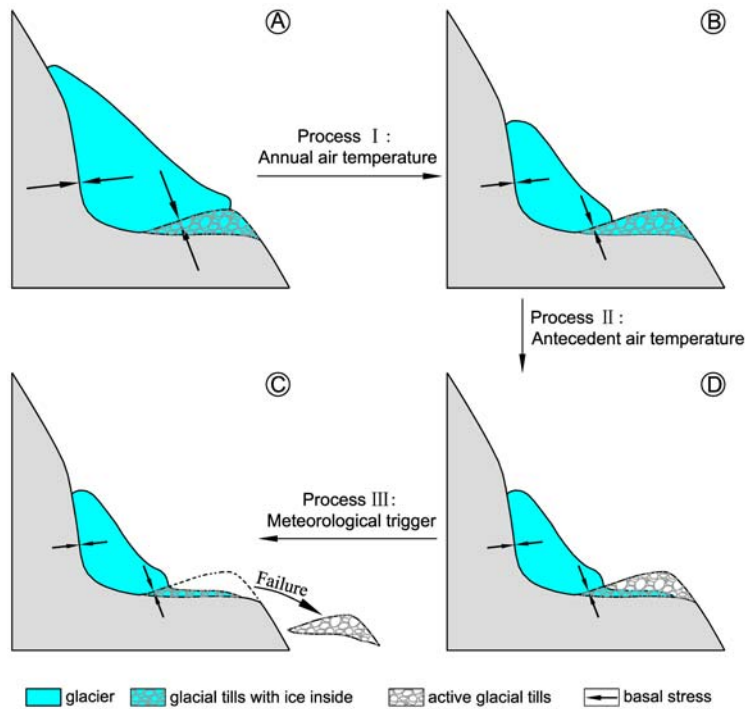

655

656

657

658

Figure 10 Changes in a glacier and frozen glacial till before periglacial debris flow initiation(A: glacial covered glacial tills; B: uncovered and frozen glacial tills; C: active glacial tills; D: failure of glacial tills)
